1 Changes in subcellular structures and states of Pumilio1 regulate the  
2 translation of target *Mad2* and *Cyclin B1* mRNAs

3

4 Natsumi Takei<sup>1†</sup>, Yuki Takada<sup>1†</sup>, Shohei Kawamura<sup>1†</sup>, Atsushi Saitoh<sup>1</sup>, Jenny Bormann<sup>2</sup>,  
5 Wai Shan Yuen<sup>2</sup>, John Carroll<sup>2</sup>, and Tomoya Kotani<sup>1,3,\*</sup>

6

7

8 <sup>1</sup>Biosystems Science Course, Graduate School of Life Science, Hokkaido University,  
9 Sapporo 060-0810, Japan

10 <sup>2</sup>Development and Stem Cells Program and Department of Anatomy and Developmental  
11 Biology, Monash Biomedicine Discovery Institute, Monash University, Melbourne,  
12 Victoria 3800, Australia

13 <sup>3</sup>Department of Biological Sciences, Faculty of Science, Hokkaido University, Sapporo  
14 060-0810, Japan

15

16

17 † These authors contributed equally to this work.

18 \*Corresponding author.

19 Tomoya Kotani,

20 Department of Biological Sciences, Faculty of Science, Hokkaido University,

21 North 10 West 8, Sapporo, Hokkaido 060-0810, Japan

22 Tel.: +81-11-706-4455

23 Fax.: +81-11-706-4455

24 E-mail: [tkotani@sci.hokudai.ac.jp](mailto:tkotani@sci.hokudai.ac.jp)

25

1 **Abstract**

2 Temporal and spatial control of mRNA translation has emerged as a major mechanism  
3 for promoting diverse biological processes. However, the molecular nature of temporal  
4 control of translation remains unclear. In oocytes, many mRNAs are deposited as a  
5 translationally repressed form and are translated at appropriate timings to promote the  
6 progression of meiosis and development. Here, we show that changes in structures and  
7 states of the RNA-binding protein Pumilio1 regulate the translation of target mRNAs  
8 and progression of oocyte maturation. Pumilio1 was shown to bind to *Mad2* and *Cyclin*  
9 *B1* mRNAs, assemble highly clustered solid-like aggregates, and surround *Mad2* and  
10 *Cyclin B1* RNA granules in mouse oocytes. These Pumilio1 aggregates were dissolved  
11 by phosphorylation prior to the translational activation of target mRNAs. Stabilization  
12 of Pumilio1 aggregates prevented the translational activation of target mRNAs and  
13 oocyte maturation. Together, our results provide an aggregation-dissolution model for  
14 the temporal and spatial control of translation.

15

16

17 Key words: vertebrate, mRNA localization, oocyte, meiosis, translational control

18

## 1 **Introduction**

2 Diverse biological processes including meiosis, embryonic development and neuronal  
3 plasticity are promoted by translational activation of dormant mRNAs at appropriate  
4 timings and places (Buxbaum et al., 2015; Doyle and Kiebler, 2011; Martin and  
5 Ephrussi, 2009; Mendez and Richter, 2001). This temporal control of translation has  
6 been most extensively studied in oocyte meiosis. Fully grown vertebrate oocytes are  
7 arrested at prophase I of meiosis and accumulate thousands of translationally repressed  
8 mRNAs in the cytoplasm (de Moor et al., 2005; Kotani et al., 2017; Masui and Clarke,  
9 1979). In response to specific cues such as hormones, oocytes resume meiosis and are  
10 arrested again at metaphase II. This process is termed oocyte maturation and is  
11 necessary for oocytes to acquire fertility. For proper progression of oocyte maturation,  
12 hundreds of dormant mRNAs are translationally activated in periods specific to distinct  
13 mRNAs (Chen et al., 2011). Of these, *Cyclin B1* mRNA, which encodes the regulatory  
14 subunit of maturation/M-phase-promoting factor (MPF), is translated in meiosis I, and  
15 the newly synthesized Cyclin B1 proteins in this period are prerequisite for the  
16 progression of meiosis (Davydenko et al., 2013; Hochegger et al., 2001; Kondo et al.,  
17 2001; Kotani and Yamashita, 2002; Ledan et al., 2001; Polanski et al., 1998).

18 Translational activation of the dormant mRNAs including *Cyclin B1* has been shown  
19 to be directed by the cytoplasmic polyadenylation of mRNAs, which is mediated by the  
20 cytoplasmic polyadenylation element (CPE) in their 3' UTR (McGrew et al., 1989;  
21 Sheets et al., 1994). The CPE-binding protein (CPEB) functions in both repression and  
22 direction of the cytoplasmic polyadenylation (Barkoff et al., 2000; de Moor and Richter,  
23 1999; Gebauer et al., 1994; Tay et al., 2000). Although many dormant mRNAs contain  
24 CPEs, they are translated in different periods during oocyte maturation, indicating that  
25 there must be additional mechanisms to determine the timings of translational activation  
26 of distinct mRNAs. However, the molecular and cellular mechanisms by which  
27 translational timings of hundreds of mRNAs are coordinated remain unclear.

28 Pumilio1 (Pum1) is a sequence-specific RNA-binding protein that belongs to the  
29 Pumilio and Fem-3 mRNA-binding factor (PUF) family, which is highly conserved in  
30 eukaryotes from yeast to human (Spasov and Jurecic, 2003; Wickens et al., 2002). Pum  
31 was identified in *Drosophila* as a protein that is essential for posterior patterning of  
32 embryos (Lehmann and Nussleinvolhard, 1987) and it was shown to repress the  
33 translation of target mRNAs in a spatially and temporally regulated manner (Asaoka-

1 Taguchi et al., 1999; Murata and Wharton, 1995). In *Xenopus*, zebrafish and mouse  
2 oocytes, Pum1 has been shown to bind to *Cyclin B1* mRNA and determine the timing of  
3 translational activation of *Cyclin B1* mRNA during oocyte maturation (Kotani et al.,  
4 2013; Nakahata et al., 2003; Ota et al., 2011; Pique et al., 2008). Pum1 knockout mice  
5 were shown to be viable but defective in spermatogenesis (Chen et al., 2012) and  
6 oogenesis (Mak et al., 2016). Pum1-deficient mice also showed neuronal degeneration  
7 in the brain through an increase in Ataxin1 protein (Gennarino et al., 2015). Pum1 was  
8 shown to target more than one thousand mRNAs in the mouse testis and brain (Chen et  
9 al., 2012; Zhang et al., 2017). The amount of proteins synthesized from these Pum1-  
10 target mRNAs, but not the amount of mRNAs, was increased in Pum1-deficient mice,  
11 indicating that Pum1 represses the translation of target mRNAs (Chen et al., 2012;  
12 Zhang et al., 2017). Despite the importance of Pum function in diverse systems, how  
13 Pum regulates the translation of target mRNAs remains to be elucidated.

14 In addition to sequence-specific RNA-binding proteins, we previously demonstrated  
15 that formation and disassembly of *Cyclin B1* RNA granules determine the timing of  
16 translational activation of mRNA, i.e., granular structures of this mRNA formed in  
17 immature, germinal vesicle (GV)-stage oocytes were disassembled at the timing of  
18 translational activation of mRNA, and stabilization and dissociation of these granules  
19 prevented and accelerated the mRNA translation, respectively (Kotani et al., 2013).  
20 Binding of Pum1 was shown to be required for the RNA granule formation, implying  
21 that Pum1 regulates the translational timing of target mRNAs through formation and  
22 disassembly of granules (Kotani et al., 2013).

23 P granules are cytoplasmic granules that consist of mRNAs and RNA-binding  
24 proteins and have been shown to behave as liquid droplets with a spherical shape in *C.*  
25 *elegance* embryos (Brangwynne et al., 2009). In addition, several RNA-binding proteins  
26 that are assembled into stress granules were shown to produce liquid droplets in vitro  
27 and in cultured cells (Lin et al., 2015; Molliex et al., 2015). Although phase changes in  
28 these liquid droplets into solid-like assemblies have been linked to degenerative  
29 diseases (Li et al., 2013; Weber and Brangwynne, 2012), more recent studies have  
30 demonstrated the assembly of solid-like substructures within stress granules (Jain et al.,  
31 2016; Shiina, 2019; Wheeler et al., 2016), suggesting physiological roles of the solid-  
32 like assemblies. However, biological function of phase changes of protein assemblies  
33 from liquid to solid states and vice versa remains to be explored.



1 In this study, we identified *Mad2* mRNA as one of the Pum1-target mRNAs in mouse  
2 oocytes and found that *Mad2* and *Cyclin B1* mRNAs were distributed as distinct  
3 granules in the cytoplasm. Interestingly, Pum1 was assembled into solid-like aggregates  
4 exhibiting highly clustered structures, and these aggregates surrounded *Mad2* and  
5 *Cyclin B1* RNA granules. The Pum1 aggregates dissolved in an early period after  
6 resumption of meiosis by phosphorylation, resulting in a liquid-like state and  
7 translational activation of *Mad2* and *Cyclin B1* mRNAs. These results provide an  
8 aggregation-dissolution model, accompanied by phase changes of RNA-binding  
9 proteins, for temporal and spatial control of mRNA translation. The results also showed  
10 the physiological importance of phase changes of proteins in RNA regulation.

11

## 12 **Results**

### 13 **Expression of *Mad2* is translationally regulated during mouse oocyte maturation**

14 *Mad2* has been shown to function as a component of spindle assembly checkpoint  
15 proteins to accurately segregate chromosomes in meiosis I of mouse oocytes (Homer et  
16 al., 2005). However, how *Mad2* is accumulated in oocytes remains unknown. To clarify  
17 the mechanism of *Mad2* accumulation in meiosis I, we first analyzed the expression of  
18 *Mad2* mRNA in mouse oocytes. Although two splicing variants of *Mad2* mRNA were  
19 isolated using purified RNAs from ovaries (Fig. 1A), RT-PCR, quantitative PCR, and *in*  
20 *situ* hybridization analyses showed that the short version of *Mad2* mRNA was dominant  
21 in oocytes (Figs. 1A-B and S1A). FISH analysis showed that *Mad2* mRNA was  
22 distributed in the oocyte cytoplasm by forming RNA granules (Fig. 1C). The amount of  
23 *Mad2* as well as that of *Cyclin B1* increased after resumption of meiosis (Fig. 1D).  
24 Consistent with this, poly(A) tails of *Mad2* mRNA were elongated 4 h after resumption  
25 of meiosis as in the case of *Cyclin B1* (Fig. 1E). Inhibition of protein synthesis with  
26 puromycin prevented the accumulation of *Mad2* in oocytes even when meiosis had  
27 resumed (Fig. S1B and C). Taken together, the results indicate that *Mad2* protein is  
28 accumulated in an early period of oocyte maturation by the translational activation of  
29 dormant mRNA stored in oocytes.

30

### 31 ***Mad2* mRNA is a Pum1-target mRNA and forms granules distinct from *Cyclin B1*** 32 **RNA granules**

33 We then assessed the mechanism by which the translation of *Mad2* mRNA is temporally

1 regulated. Since *Mad2* mRNA was translated in a period similar to that for *Cyclin B1*  
2 mRNA and contains several putative Pumilio-binding elements (PBEs) in its 3'UTR  
3 (Fig. S2A), we investigated whether Pum1 binds to *Mad2* mRNA by using an  
4 immunoprecipitation assay followed by RT-PCR. *Mad2* and *Cyclin B1* mRNAs, but not  
5  $\alpha$ -tubulin and  $\beta$ -actin mRNAs, were detected in precipitations with an anti-Pum1  
6 antibody, while neither of them was detected in precipitations with control IgG (Fig.  
7 2A), indicating that Pum1 targets *Mad2* mRNA as well as *Cyclin B1* mRNA. From  
8 these results, we speculated that both mRNAs were assembled into the same granules.  
9 However, double FISH analysis showed that the two mRNAs formed distinct granules  
10 (Fig. 2B). Notably, granules containing *Mad2* or *Cyclin B1* mRNA were found to be  
11 distributed close to each other (Fig. 2B, arrows).

12 Time course analysis showed that the number of *Mad2* RNA granules was decreased  
13 at 4 h (prometaphase I) and that the granules had almost completely disappeared at 18 h  
14 (metaphase II) after resumption of meiosis, being consistent with the changes in *Cyclin*  
15 *B1* RNA granules (Fig. 2C and D) (Kotani et al., 2013). These results suggest that  
16 translation of *Mad2* mRNA is temporally regulated through formation and disassembly  
17 of RNA granules, similar to the cytoplasmic regulation of *Cyclin B1* mRNA (Kotani et  
18 al., 2013).

19

## 20 **Pum1 forms aggregates that surround target mRNAs**

21 To further assess the mechanism by which translation of *Mad2* and *Cyclin B1* mRNAs  
22 is temporally regulated by Pum1, we analyzed the distribution of Pum1 in the oocyte  
23 cytoplasm. Immunofluorescence analysis showed that Pum1 was ununiformly  
24 distributed in the cytoplasm of immature oocytes and appeared to form aggregates in  
25 highly clustered structures (Fig. 3A). FISH analysis showed that Pum1 aggregates  
26 surrounded and partially overlapped *Cyclin B1* and *Mad2* RNA granules (Fig. 3B). To  
27 assess the molecular mechanisms of Pum1 aggregation, we then examined the  
28 distribution of GFP-Pum1 and mutant forms of Pum1 by injecting mRNA into mouse  
29 oocytes. GFP-Pum1 was distributed in a way similar to that of endogenous Pum1, i.e., it  
30 appeared to form highly clustered aggregates (Fig. 3C and D) surrounding *Cyclin B1*  
31 and *Mad2* RNA granules (Fig. S2B). Pum1 contains a glutamine/asparagine (Q/N)-rich  
32 domain (Fig. 3E), also identified as a prion-like domain (Fig. S2C; Lancaster et al.,  
33 2014), which is thought to promote highly ordered aggregation of proteins (Lancaster et

1 al., 2014; Salazar et al., 2010). GFP-Pum1 that lacks the Q/N-rich domain (GFP-  
2 Pum1  $\Delta$ QN) (Fig. 3E) was distributed uniformly throughout the oocyte cytoplasm (Fig.  
3 3C). Taken together, the results indicate that Pum1 assembles into aggregates by the  
4 Q/N-rich domain, and these aggregates seem to cover target mRNAs.

5 We then analyzed the distribution of Pum1 lacking the N-terminus (GFP-Pum1  $\Delta$ N) or  
6 lacking the C-terminus, which contains the PUF domain responsible for binding to  
7 target mRNAs (Zhang et al., 1997) (GFP-Pum1  $\Delta$ C: Fig. 2E). GFP-Pum1  $\Delta$ N formed  
8 aggregates similar to those of GFP-Pum1 (Fig. S2D and Fig. 6A). In contrast, GFP-  
9 Pum1  $\Delta$ C formed aggregates larger than those of GFP-Pum1 (Fig. S2D and Fig. 6A),  
10 indicating that the C-terminus PUF domain is involved in regulating the size of  
11 aggregates.

12

### 13 **Pum1 shows insoluble and immobile properties in immature oocytes**

14 We then examined the properties of endogenous Pum1 by ultracentrifugation. Since we  
15 were unable to obtain appropriate amounts of materials by using mouse oocytes, we  
16 used zebrafish oocytes for this analysis. Zebrafish Pum1 has been shown to target *cyclin*  
17 *B1* mRNA (Kotani et al., 2013) and it contains the Q/N-rich domain also identified as a  
18 prion-like domain (Fig. S2C). Ultracentrifugation analysis showed that most of the  
19 endogenous Pum1 ( $64.8\% \pm 3.4\%$ ,  $n = 3$ ) was concentrated in an insoluble fraction in  
20 immature oocytes (Fig. 4A), supporting the results of immunofluorescence showing that  
21 endogenous Pum1 forms aggregates (Fig. 3). These results suggest that highly clustered  
22 Pum1 aggregates exhibit a solid-like property.

23 We next examined the properties of GFP-Pum1 in mouse oocytes by FRAP analysis.  
24 As a control, GFP-Pum1  $\Delta$ QN was analyzed. After photobleaching, the fluorescence of  
25 GFP-Pum1 and GFP-Pum1  $\Delta$ QN gradually recovered (Fig. 4B). The fluorescence  
26 recovery curves were fitted to a double exponential association model. The half time of  
27 recovery ( $t_{1/2}$ ) of the first fraction of GFP-Pum1 was rapid, while that of the second  
28 fraction of GFP-Pum1 was slow (Fig. 4C, left), suggesting that a part of Pum1 forms  
29 large complexes. Moreover, a critical finding was that a significant fraction of GFP-  
30 Pum1 ( $40.7\% \pm 8.6\%$ ,  $n = 12$ ) showed immobility (not recovering after  
31 photobleaching), while only a small fraction of GFP-Pum1  $\Delta$ QN ( $13.6\% \pm 5.5\%$ ,  $n = 14$ )  
32 was static (Fig. 4B and C, right). Thereby, the Q/N-rich region promotes the assembly  
33 of Pum1 into highly ordered aggregates in an immobile state.

1 We further analyzed the properties of Pum1 by permeabilizing oocytes with  
2 digitonin. GFP rapidly diffused out of the oocytes after permeabilization (Fig. 4D and  
3 E). In contrast, the structure and intensity of GFP-Pum1 aggregates persisted after  
4 permeabilization (Fig. 4D and E). Taken together, the immunofluorescence,  
5 ultracentrifugation, FRAP and permeabilization analyses demonstrate that Pum1  
6 assembles into aggregates in a solid-like state in immature oocytes. A recent study  
7 demonstrated that GFP-Pum1 forms solid-like substructures of RNA granules in human  
8 culture cells (Shiina, 2019), being consistent with our results in oocytes.

### 9 10 **Pum1 aggregates are dissolved prior to translational activation of target mRNAs**

11 We next examined whether the distribution and properties of Pum1 changed during  
12 oocyte maturation. Time course analysis of GFP-Pum1 showed that the Pum1  
13 aggregates disappeared after resumption of meiosis (Fig. 5A). Most of the aggregates of  
14 GFP-Pum1 had disappeared 4 h after resumption of meiosis, at which time poly(A) tails  
15 of *Mad2* and *Cyclin B1* mRNA were elongated (Fig. 1E) and the granules of both RNAs  
16 had disappeared (Fig. 2C), suggesting a link between translational activation of target  
17 mRNAs and Pum1 dissolution. Consistent with these observations, the  
18 ultracentrifugation assay showed that a large part of endogenous Pum1 became soluble  
19 ( $69.0\% \pm 4.4\%$ ,  $n = 3$ ) in mature oocytes, compared with the soluble fraction in  
20 immature oocytes ( $35.2\% \pm 3.4\%$ ,  $n = 3$ ) (Fig. 4A). FRAP analysis in mouse oocytes  
21 indicated that the  $t_{1/2}$  of GFP-Pum1 was not significantly different between immature and  
22 mature oocytes (Fig. 5B and C, left). In contrast, the percentage of immobile fractions  
23 of GFP-Pum1 was significantly reduced in mature oocytes ( $18.8\% \pm 6.8\%$ ,  $n = 6$ )  
24 compared with that in immature oocytes ( $40.7\% \pm 8.6\%$ ,  $n = 12$ ) (Fig. 5B and C, right).  
25 Taken together, the results indicate that Pum1 aggregates dissolve during oocyte  
26 maturation and suggest that the change in the property of Pum1 from insoluble, solid-  
27 like to soluble, liquid-like is crucial for temporal regulation of target mRNA translation.

### 28 29 **Stabilization of Pum1 aggregates prevents the translation of target mRNAs**

30 We next assessed whether the change in the property of Pum1 was involved in the  
31 translational regulation of target mRNAs. By observing the distributions of truncated  
32 forms of Pum1 after resumption of meiosis, we found that the large aggregates of GFP-  
33 Pum1  $\Delta C$  were stable and persisted until 18 h (Fig. 6A). In contrast, GFP-Pum1  $\Delta QN$  no

1 longer formed aggregates (Fig. S3A), and the aggregates of GFP-Pum1  $\Delta$ N were  
2 dissociated within 4 h (Fig. S3B and Fig. 6A). Consistent with the observations after  
3 resumption of meiosis, GFP-Pum1, Pum1  $\Delta$ QN, and Pum1  $\Delta$ N did not affect the  
4 progression of oocyte maturation, while GFP-Pum1  $\Delta$ C prevented polar body extrusion  
5 (Fig. 6A and B). Temporal synthesis of proteins is required for proper spindle formation  
6 in meiosis I (Davydenko et al., 2013; Kotani and Yamashita, 2002; Polanski et al., 1998;  
7 Susor et al., 2015). In oocytes expressing GFP-Pum1  $\Delta$ C, meiosis I spindles were  
8 defective and synthesis of Mad2 and Cyclin B1 was attenuated (Fig. 6C and D). These  
9 results suggest that insoluble GFP-Pum1  $\Delta$ C inhibited translational activation of Pum1-  
10 target mRNAs by stabilizing Pum1 aggregates, resulting in failure in spindle formation  
11 and polar body extrusion. Since Pum1 targets thousands of mRNAs in the testis and  
12 brain (Chen et al., 2012; Zhang et al., 2017), syntheses of many proteins responsible for  
13 correct spindle formation would be attenuated in oocytes expressing GFP-Pum1  $\Delta$ C.

14 We then examined the effects of Pum1 inhibition on the progression of oocyte  
15 maturation by injecting the anti-Pum1 antibody. To effectively analyze the effect of the  
16 anti-Pum1 antibody, we incubated oocytes with 1  $\mu$ M milrinone, which partially  
17 prevents resumption of meiosis. Under this condition, 50-90% of the oocytes underwent  
18 germinal vesicle breakdown (GVBD) (Fig. 6E and F) in a manner dependent on protein  
19 synthesis (Fig. 6E). Injection of the anti-Pum1 antibody, but not control IgG, prevented  
20 GVBD and dissolution of GFP-Pum1 aggregates (Fig. 6F and G). The injected anti-  
21 Pum1 antibody was distributed within the cytoplasm in a way similar to that of  
22 endogenous Pum1 (Fig. 6H). These results strongly suggest that the anti-Pum1 antibody  
23 inhibited the dissolution of endogenous Pum1 aggregates and thereby prevented the  
24 translational activation of Pum1-target mRNAs.

25

## 26 **Pum1 phosphorylation promotes the dissolution of aggregates**

27 We finally assessed the mechanism by which Pum1 aggregates are dissolved. As  
28 observed in *Xenopus* and zebrafish (Ota et al., 2011; Saitoh et al., 2018), the  
29 electrophoretic mobility of Pum1 was reduced in mature mouse oocytes (Fig. 7A, left).  
30 This reduction was recovered by phosphatase treatment (Fig. 7A, right), indicating that  
31 Pum1 is phosphorylated during mouse oocyte maturation. Treatment of immature  
32 oocytes with okadaic acid (OA), a protein phosphatase 1 and 2A (PP1 and PP2A)  
33 inhibitor, induced Pum1 phosphorylation and rapid dissolution of Pum1 aggregates (Fig.

1 7B-D). These results suggest that kinases responsible for Pum1 phosphorylation are  
2 present and at least partially active in immature oocytes. Polo-like kinase (Plk) 1 and 4  
3 were shown to be present in immature mouse oocytes (Bury et al., 2017; Pahlavan et al.,  
4 2000). Interestingly, inhibition of Plk4, but not that of Plk1, prevented the dissolution of  
5 Pum1 aggregates (Figs. 7C-D and S3C). Inhibition of Plk4 also prevented the  
6 phosphorylation of Pum1 (Fig. 7E). These results indicate that Plk4-mediated  
7 phosphorylation of Pum1 promotes dissolution of Pum1 aggregates.

8

## 9 **Discussion**

10 Extensive biochemical studies have demonstrated the importance of *cis*-acting mRNA  
11 elements and *trans*-acting RNA-binding proteins in the regulation of temporal  
12 translation (Radford et al., 2008). However, their cytoplasmic and molecular  
13 mechanisms remain largely unknown. Our results provide an aggregation-dissolution  
14 model for temporal and spatial control of mRNA translation, i.e., Pum1 aggregates in  
15 clustered solid-like structures ensure translational repression of target mRNAs by stably  
16 maintaining their granular structures, and the dissolution of aggregates into a liquid-like  
17 state by phosphorylation permits the disassembly of granules and translational  
18 activation of mRNAs. Given that many dormant mRNAs stored in oocytes contain  
19 PBEs (Chen et al., 2011) and Pum1 targets more than one thousand mRNAs in the testis  
20 and brain (Chen et al., 2012), Pum1 would target a large number of mRNAs in oocytes.  
21 In addition, Pum1 aggregates might be comprised of these target mRNAs and related  
22 proteins and thereby allow their coordinated regulation. Our results will be a basis for  
23 understanding how translational timings of hundreds of mRNAs are coordinately  
24 regulated.

25

## 26 **Phase changes of Pum1 and translational regulation of target mRNAs**

27 Recent studies have demonstrated that many of the RNA-binding proteins harbor prion-  
28 like domains and that some of these proteins have the ability to assemble RNA granules  
29 (Decker et al., 2007; Gilks et al., 2004; Reijns et al., 2008). These RNA-binding  
30 proteins were shown to promote liquid-liquid phase separation, resulting in the  
31 assembly of protein-RNA complexes into droplets (Elbaum-Garfinkle et al., 2015; Lin  
32 et al., 2015; Molliex et al., 2015; Nott et al., 2015). These droplets are thought to  
33 function as partitions that effectively maintain stability and/or translational repression of



1 mRNAs. In contrast, phase transition of the liquid droplets into solid-like structures  
2 such as amyloid fibrils has been thought to contribute to pathological diseases such as  
3 amyotrophic lateral sclerosis (ALS) (Li et al., 2013; Weber and Brangwynne, 2012).  
4 However, more recently, solid granules were found to assemble during muscle  
5 regeneration in a physical state (Vogler et al., 2018). In addition, core regions of stress  
6 granules were shown to exhibit solid-like properties (Jain et al., 2016; Shiina, 2019;  
7 Wheeler et al., 2016). Although these findings suggest the involvement of solid granules  
8 in RNA regulation, the physiological importance of the phase changes of protein  
9 aggregation from liquid to solid states and vice versa remains unclear.

10 In this study, we demonstrated that Pum1 assembled into aggregates in highly  
11 clustered structures through the Q/N-rich region and these aggregates showed solid-like  
12 properties in immature oocytes (Figs. 3 and 4). After initiation of oocyte maturation, the  
13 Pum1 aggregates dissolved into a liquid-like state (Figs. 4A and 5). The mutant form of  
14 Pum1 that lacks the C-terminal PUF domain, Pum1  $\Delta$ C, is expected to be unable to bind  
15 to target mRNAs but to have the ability to form assemblies via the Q/N-rich region.  
16 Since an RNA molecule was shown to buffer the assembly of RNA-binding proteins  
17 that harbor prion-like domains into a solid-like aggregates (Maharana et al., 2018), it is  
18 possible that the lack of RNA-binding ability of Pum1  $\Delta$ C resulted in the assembly of  
19 large and stable aggregates (Figs. S2D and 6A). Pum1  $\Delta$ C would stabilize endogenous  
20 Pum1 aggregates via the Q/N-rich region-mediated aggregation and thereby prevent the  
21 translational activation of Pum1-target mRNAs (Fig. 6A-D). The anti-Pum1 antibody  
22 also prevented dissociation of Pum1 aggregates (Fig. 6E-H). One possible explanation  
23 for this is that the binding of Pum1 antibodies attenuated the phosphorylation of Pum1.  
24 Another possibility is that the antibody affected the conformation or composition of  
25 Pum1 assemblies, preventing aggregate dissolution and translational activation of  
26 mRNAs. Collectively, our results demonstrated a physiological significance of phase  
27 changes of protein aggregation in translational repression and activation of target  
28 mRNAs.

29

### 30 **Regulation of the subcellular structures and states of Pum1 by phosphorylation** 31 **and dephosphorylation**

32 P granules are the germinal granules in *C. elegans* that are important for fate decision  
33 of germline cells. Live imaging of embryos demonstrated that P granules behave as

1 dynamic liquid droplets (Brangwynne et al., 2009). Intriguingly, disassembly of P  
2 granules after fertilization was shown to require MBK-2 kinase, while subsequent  
3 assembly of P granules at the posterior region of embryos required protein phosphatase  
4 2A (PP2A) (Gallo et al., 2010; Wang et al., 2014). MEG-1 and MEG-3 were found to be  
5 the substrates of MBK-2 and PP2A in the granules (Wang et al., 2014). These results  
6 demonstrated that the dynamics of liquid RNA granules is regulated by phosphorylation  
7 and dephosphorylation of assembled proteins.

8 Our results suggest the importance of protein phosphorylation and dephosphorylation  
9 for changes in structures and states of solid-like aggregates. SDS-PAGE analysis  
10 demonstrated that Pum1 was phosphorylated during mouse oocyte maturation (Fig. 7A).  
11 Interestingly, treatment of oocytes with OA, an inhibitor of PP1 and PP2A, rapidly  
12 dissociated Pum1 aggregates and induced Pum1 phosphorylation (Fig. 7B-D). Since  
13 PP2A was shown to be localized in the cytoplasm of GV-stage mouse oocytes, while  
14 PP1 was dominantly localized in the nucleus (Smith et al., 1998), PP2A would be a  
15 phosphatase involved in Pum1 dephosphorylation and the maintenance of Pum1  
16 aggregates. Even when the activity of PP1 and PP2A was inhibited by OA, Pum1 was  
17 not phosphorylated and the aggregates persisted in the presence of a Plk4 inhibitor (Fig.  
18 7C-E), suggesting that Plk4 is a kinase responsible for Pum1 phosphorylation and  
19 aggregate dissolution. However, other kinases would phosphorylate Pum1, since  
20 inhibition of Plk4 activity delayed, but did not completely prevent, the dissolution of  
21 Pum1 aggregates and Pum1 phosphorylation after initiation of oocyte maturation  
22 (unpublished data). Puf3, one of the PUF family proteins in yeast, was shown to be  
23 phosphorylated at up to 20 sites throughout the entire region (Lee and Tu, 2015). In  
24 addition, we previously showed that Pum1 was phosphorylated at multiple sites in an  
25 early period of oocyte maturation in zebrafish (Saitoh et al., 2018). Although the  
26 phosphorylation sites responsible for the aggregate dissolution remain to be identified,  
27 these results suggest that many sites including those in the Q/N-rich domain might be  
28 phosphorylated, resulting in Pum1 aggregate dissolution.

29

### 30 **Subcellular structures of Pum1 and homogenous RNA granules**

31 An intriguing finding in this study is that Pum1-target *Mad2* and *Cyclin B1* mRNAs  
32 formed distinct granules in the oocyte cytoplasm, instead of making granules containing  
33 both mRNAs (Fig. 2). Pum1 was found to produce highly clustered structures that



1 surrounded both *Mad2* and *Cyclin B1* RNA granules (Fig. 3). These structures partially  
2 resemble those of germ granules in *Drosophila* embryos, in which mRNAs form  
3 homogenous RNA clusters and are spatially positioned within the granules, while RNA-  
4 binding proteins are evenly distributed throughout the granules (Trcek et al., 2015).  
5 These findings suggest the existence of a common mechanism by which each mRNA  
6 could be organized into homogenous particles. However, in contrast to our findings, the  
7 structures of germ granules were not changed during early stages of embryogenesis and  
8 were independent of the control of mRNA translation and degradation (Trcek et al.,  
9 2015). Therefore, the function of spatially organized structures of germ granules in  
10 *Drosophila* embryos seems to be different from the function of subcellular structures of  
11 Pum1 and RNA granules in mouse oocytes.

12 Our results showed that Pum1 aggregates surrounded and overlapped *Mad2* and  
13 *Cyclin B1* RNA granules but were not localized at the center of granules (Fig. 3). Given  
14 that Pum1 was shown to bind directly to PBE in the 3'UTR of target mRNAs including  
15 *Cyclin B1* (Kotani et al., 2013; Nakahata et al., 2003; Ota et al., 2011; Pique et al.,  
16 2008), Pum1-target mRNAs may compose highly ordered structures within granules, in  
17 which the 3' ends of mRNAs are localized at the periphery of granules as in the case of  
18 a long noncoding RNA, *Neat1*, in paraspeckle nuclear bodies (Souquere et al., 2010;  
19 West et al., 2016). Details of the molecular mechanisms by which Pum1 is assembled  
20 into aggregates remain unknown. One possible model is that Pum1 binds to a target  
21 mRNA via the PUF domain and subsequently assembles into aggregates via the Q/N-  
22 rich region. Another possibility is that Pum1 contains two populations; one population  
23 binds to target mRNAs and the other functions as structural scaffolds without binding to  
24 mRNAs. In addition to the homogenous assembly of Pum1, heterogeneous assembly  
25 with other RNA-binding proteins may produce aggregates. In any case, the resulting  
26 Pum1 aggregates in clustered structures would make compartments that function as  
27 regulatory units with related proteins assembled together or separately. These units  
28 enable to coordinately regulate the translation of assembled mRNAs. Since Pum1  
29 functions in diverse systems and other RNA-binding proteins that harbor prion-like  
30 domains may function in a manner similar to that of Pum1, our results will contribute to  
31 an understanding of the nature of temporal and spatial control of translation in many  
32 cell types of diverse organisms.

33

## 1 **Materials and Methods**

### 2 **Preparation of ovaries and oocytes**

3 All animal experiments in this study were approved by the Committee on Animal  
4 Experimentation, Hokkaido University. Mouse ovaries were dissected from 8-week-old  
5 females in M2 medium (Sigma). Oocytes were retrieved from ovaries by puncturing the  
6 ovaries with a needle in M2 medium containing 10  $\mu$ M milrinone, which prevents  
7 resumption of oocyte maturation. To induce oocyte maturation, the isolated oocytes  
8 were washed three times and incubated with M2 medium without milrinone at 37°C.  
9 Alternatively, oocyte maturation was induced by injection of 5 U of hCG 48 h after  
10 injection of 5 U of pregnant mare serum gonadotropin into 3-week-old females. For RT-  
11 PCR and poly(A) test (PAT) assays, ovaries and oocytes were extracted with Trizol  
12 reagent (Invitrogen) and total RNA was used for RT-PCR and RNA ligation-coupled  
13 RT-PCR. For *in situ* hybridization analysis, mouse ovaries were fixed with 4%  
14 paraformaldehyde in PBS (137 mM NaCl, 2.7 mM KCL, 10 mM Na<sub>2</sub>HPO<sub>4</sub>, and 2 mM  
15 KH<sub>2</sub>PO<sub>4</sub>, pH 7.2) (4% PFA/PBS) overnight at 4°C. For immunoblotting analysis, 30  
16 oocytes were washed with PBS and extracted with lithium dodecylsulfate (LDS) sample  
17 buffer (Novex) at 0, 10, and 18 h after resumption of oocyte maturation. For IP/RT-PCR  
18 analysis, mouse ovaries were homogenized with an equal volume of ice-cold extraction  
19 buffer (EB: 100 mM  $\beta$ -glycerophosphate, 20 mM HEPES, 15 mM MgCl<sub>2</sub>, 5 mM EGTA,  
20 1 mM dithiothreitol, 100  $\mu$ M (*p*-amidinophenyl)methanesulfonyl fluoride, 3  $\mu$ g/ml  
21 leupeptin; pH 7.5) containing 1% Tween20 and 100 U/ml RNasin Plus RNase Inhibitor  
22 (Promega). After centrifugation at 15,000 g for 10 min at 4°C, the supernatant was  
23 collected and used for IP.

24 Zebrafish ovaries were dissected from adult females in zebrafish Ringer's solution  
25 (116 mM NaCl, 2.9 mM KCl, 1.8 mM CaCl<sub>2</sub>, and 5 mM HEPES; pH 7.2). Zebrafish  
26 oocytes were manually isolated from ovaries with forceps under a dissecting  
27 microscope. Oocyte maturation was induced by treatment with 1  $\mu$ g/ml of 17 $\alpha$ ,20 $\beta$ -  
28 dihydroxy-4-pregnen-3-one, a maturation-inducing hormone in fish. For  
29 ultracentrifugation analysis, fully grown immature oocytes and oocytes 3 h after MIH  
30 stimulation (matured oocytes) were homogenized with an equal volume of ice-cold EB  
31 containing 0.2% Tween20. After ultracentrifugation at 90,000 g for 30 min at 4°C, the  
32 supernatant and precipitates were collected and used for immunoblot analysis.

33

## 1 **RT-PCR and quantitative PCR**

2 Total RNA extracted from mouse ovaries or 50 immature oocytes was used for cDNA  
3 synthesis using the Super Script III First Strand Synthesis System (Invitrogen). The full  
4 length of *Mad2* mRNA was amplified with the cDNA and primer sets specific to *Mad2*,  
5 *mMad2*-f1 (5'-GTA GTG TTC TCC GTT CGA TCT AG-3') and *mMad2*-r1 (5'-GTA  
6 TCA CTG ACT TTT AAA GCT TGA TTT TTA-3'). The amounts of short and long  
7 *Mad2* mRNAs were quantified by using a real-time PCR system with SYBR green PCR  
8 Master Mix (Applied Biosystems) according to the manufacturer's instructions. The  
9 short and long *Mad2* transcripts were amplified with the cDNA and primer sets to both  
10 types of *Mad2*, *mMad2*-f2 (5'-GAA TAG TAT GGT GGC CTA CAA-3') and *mMad2*-  
11 r2 (5'-TTC CCT CGT TTC AGG CAC CA-3'), and primer sets specific to long *Mad2*,  
12 *mMad2*-f3 (5'-CTG GAC CAG GAT ATA AAG AAG CG-3') and *mMad2*-r3 (5'-GCT  
13 GTC CTC CCT GCC TCT CT-3'). The signals obtained with distinct primer sets were  
14 normalized by standard curves obtained with plasmid DNAs encoding the short or long  
15 *Mad2* gene.

16

## 17 **Section *in situ* hybridization**

18 Section *in situ* hybridization and fluorescent *in situ* hybridization (FISH) with the  
19 tyramide signal amplification (TSA) Plus DNP system (PerkinElmer) were performed  
20 according to the procedure reported previously (Takei et al., 2018). Briefly, fixed  
21 ovaries were dehydrated, embedded in paraffin, and cut into 7- $\mu$ m-thick sections.  
22 Digoxigenin (DIG)-labeled antisense RNA probes for the full length of short *Mad2* and  
23 sequences specific to long *Mad2* were used for detection of *Mad2* gene transcripts. No  
24 signal was detected with sense probes. After hybridization and washing, samples were  
25 incubated with an anti-DIG-horseradish peroxidase (HRP) antibody (Roche) (1:500  
26 dilution) for 30 min. To detect *Mad2* transcripts by alkaline phosphatase (AP) staining,  
27 reaction with tyramide-dinitrophenyl (DNP) (PerkinElmer) was performed according to  
28 the manufacturer's instructions. The samples were then incubated with an anti-DNP-AP  
29 antibody (PerkinElmer) (1:500 dilution) for 30 min, followed by reaction with NBT and  
30 BCIP according to the manufacturer's instructions. To detect *Mad2* transcripts by  
31 fluorescence microscopy, reaction with tyramide-Fluorescein (PerkinElmer) was  
32 performed according to the manufacturer's instructions. To detect nuclei, samples were  
33 incubated with 10  $\mu$ g/ml Hoechst 33258 for 10 min. After being mounted with a

1 Prolong Antifade Kit (Molecular probes), the samples were observed under an LSM 5  
2 LIVE confocal microscope (Carl Zeiss) at room temperature using a Plan Aplanachromat  
3 63x/1.4 NA oil differential interference contrast lens and LSM 5 DUO 4.2 software  
4 (Carl Zeiss).

5 Double *in situ* hybridization of *Mad2* and *Cyclin B1* transcripts was performed as  
6 follows. A fluorescein-labeled antisense RNA probe for *Cyclin B1* was used for  
7 detection of the *Cyclin B1* gene transcript. Seven- $\mu$ m-thick sections of mouse ovaries  
8 were hybridized with a mixture of *Mad2* and *Cyclin B1* antisense RNA probes. Then the  
9 samples were incubated with an anti-Fluorescein-HRP antibody (Roche) (1:200  
10 dilution) for 30 min. Reaction with tyramide-Cy3 (PerkinElmer) was performed  
11 according to the manufacturer's instructions. For inactivating HRP, samples were  
12 incubated with 1% H<sub>2</sub>O<sub>2</sub> in PBS for 15 min. Detection of the DIG-labeled antisense  
13 *Mad2* RNA probe was performed as described above. After staining with Hoechst  
14 33258, the samples were mounted and observed under the LSM5LIVE confocal  
15 microscope. The number of *Mad2* and *Cyclin B1* RNA granules was quantified using  
16 ImageJ software, which enables detection of granules according to size (larger than 0.2  
17  $\mu$ m) and intensity at the center of granules. Similar results were obtained using a  
18 fluorescein-labeled antisense RNA probe for *Mad2* and a DIG-labeled RNA probe for  
19 *Cyclin B1*.

20

## 21 **Immunoblotting**

22 Mouse oocyte extracts were separated by SDS-PAGE with Bolt Bis-Tris Plus Gels  
23 (Novex), blotted onto an Immobilon membrane using a Bolt Mini Blot Module  
24 (Novex), and probed with an anti-human Pum1 goat antibody (1:1000 dilution) (Bethyl  
25 Laboratories, Inc.), an anti-human Cyclin B1 rabbit antibody (1:100 dilution) (Santa  
26 Cruz Biotechnology, Inc.), an anti-hamster Cyclin B1 mouse monoclonal antibody  
27 (1:1000 dilution) (V152, Abcam), and an anti-human Mad2 rabbit antibody (1:1000  
28 dilution) (Bethyl Laboratories, Inc.). The supernatant and precipitates of zebrafish  
29 oocyte extracts were separated by SDS-PAGE, blotted onto an Immobilon membrane,  
30 and probed with an anti-*Xenopus* Pum1 mouse monoclonal antibody (1:1000 dilution)  
31 (Pum2A5) and an anti-GM130 mouse monoclonal antibody (1:250 dilution) (BD  
32 Biosciences). The intensity of signals was quantified using ImageJ software.

33

1 **Poly(A) test (PAT) assay**

2 RNA ligation-coupled RT-PCR was performed according to the procedure reported  
3 previously (Kotani et al., 2013). Four hundred ng of total RNA extracted from pools of  
4 250 mouse oocytes was ligated to 400 ng of P1 anchor primer (5'-P-GGT CAC CTT  
5 GAT CTG AAG C-NH<sub>2</sub>-3') in a 10- $\mu$ l reaction using T4 RNA ligase (New England  
6 Biolabs) for 30 min at 37°C. The ligase was inactivated for 5 min at 92°C. Eight  $\mu$ l of  
7 the RNA ligation reaction was used in a 20- $\mu$ l reverse transcription reaction using the  
8 Superscript III First Strand Synthesis System with a P1' primer (5'-GCT TCA GAT  
9 CAA GGT GAC CTT TTT TTT-3'). Two  $\mu$ l of the cDNA was used for the 1st PCR  
10 with the P1' primer and an m*Mad2*-f4 primer (5'-GAC CCC ATA TTG AAA TAC ATG  
11 C-3') or m*Cyclin B1*-f1 primer (5'-CCA CTC CTG TCT TGT AAT GC-3') for 45  
12 cycles. One  $\mu$ l of the 1st PCR reaction was used for the 2nd PCR with the IRD800-P1'  
13 primer (5'-IRD800-GCT TCA GAT CAA GGT GAC CTT TTT TTT-3') and an  
14 m*Mad2*-f5 primer (5'-GAG CTC ACA ACG CAG TTG-3') or m*Cyclin B1*-f2 primer  
15 (5'-CCT GGA AAA GAA TCC TGT CTC-3') for 20 cycles. The PCR product was  
16 resolved on a 3% TAE gel and observed by using Odessay (M&S TechnoSystem). We  
17 confirmed that the increase in PCR product length was due to elongation of the poly(A)  
18 tails by cloning the 2nd PCR products and sequencing them.

19

20 **RT-PCR analysis after IP (IP/RT-PCR)**

21 Eighty  $\mu$ l of mouse ovary extracts was incubated with 4  $\mu$ l of 1.0  $\mu$ g/ml anti-human  
22 Pum1 goat antibody or 4  $\mu$ l of 1.0  $\mu$ g/ml control goat IgG for 1 h at 4°C. The extracts  
23 were then incubated with protein A-Sepharose beads (GE Healthcare) for 3 h at 4°C and  
24 washed five times with EB containing 1% Tween 20. After extraction of mRNAs from  
25 the beads with Trizol reagent, RT-PCR was performed using primer sets specific to  
26 *Mad2*, m*Mad2*-f6 (5'-GTG ACC ATT GTT AAA GGA ATC CAT CCC-3') and m*Mad2*-  
27 r1, to *Cyclin B1*, m*Cyclin B1*-f3 (5'-AGT CCC TCA CCC TCC CAA AAG C-3') and  
28 m*Cyclin B1*-r1 (5'-AAA GCT TTC CAC CAA TAA ATT TTA TTC AAC-3'), to  $\beta$ -  
29 *actin*, m $\beta$ -*actin* -f1 (5'-AGT CCC TCA CCC TCC CAA AAG C-3') and m $\beta$ -*actin* -r1  
30 (5'-GGT CTC AAG TCA GTG TAC AGG C-3'), and to  $\alpha$ -*tubulin*, m $\alpha$ -*tubulin*-f1 (5'-  
31 CTT TGT GCA CTG GTA TGT GGG T-3') and m $\alpha$ -*tubulin*-r1 (5'-ATA AGT GAA  
32 ATG GGC AGC TTG GGT-3'). The intensity of signals was quantified using ImageJ  
33 software.

1

## 2 **Immunofluorescence**

3 Fixed ovaries were dehydrated, embedded in paraffin, and cut into 7- $\mu$ m-thick sections.  
4 After rehydration, samples were microwaved for 10 min with 0.01 M citric acid (pH  
5 6.0) containing 0.05% Tween20, followed by cooling down for 40 min. After incubation  
6 with a TNB blocking solution (PerkinElmer) for 1 h at room temperature, the samples  
7 were incubated with anti-human Pum1 goat antibody (1:100 dilution) (Novus  
8 Biologicals) at 4°C for overnight. The samples were then incubated with anti-goat IgG-  
9 Alexa Fluor Plus 647 antibody (1:200 dilution) (Invitrogen) at room temperature for 1  
10 h. After staining with Hoechst 33258, the samples were mounted and observed under  
11 the LSM 5 LIVE confocal microscope. No signal was detected in the reaction without  
12 the anti-Pum1 antibody. To simultaneously detect Pum1 and *Cyclin B1* and *Mad2*  
13 mRNAs, the samples were immunostained with the Pum1 antibody as described above  
14 after detection of the *Cyclin B1* and *Mad2* RNA probes in *in situ* hybridization analysis.

15

## 16 **mRNA injection and immunostaining**

17 Sequences encoding the full length and parts of mouse Pum1 ( $\Delta$ QN,  $\Delta$ N and  $\Delta$ C) were  
18 cloned into pCS2-GFP-N to produce Pum1 fused with GFP at the N terminus of Pum1.  
19 mRNAs encoding GFP, GFP-Pum1, GFP-Pum1  $\Delta$ QN, GFP-Pum1  $\Delta$ N, and GFP-  
20 Pum1  $\Delta$ C were synthesized with an mMESAGE mMACHINE SP6 kit (Life  
21 Technologies) and dissolved in distilled water. Ten pg of the mRNAs was injected into  
22 fully grown mouse oocytes using an IM-9B microinjector (Narishige) under a Dmi8  
23 microscope (Leica) in M2 medium containing 10  $\mu$ M milrinone. After being incubated  
24 for 4 h at 37°C, the oocytes were fixed with 2% PFA/PBS containing 0.05% Triton-  
25 X100 for 1 h at 4°C for *in situ* hybridization analysis or were washed four times with  
26 M2 medium without milrinone for induction of oocyte maturation. At the appropriate  
27 time points after resumption of meiosis, the distribution of proteins fused with GFP was  
28 observed under the LSM 5 LIVE confocal microscope. To simultaneously detect GFP-  
29 Pum1 and *Cyclin B1* or *Mad2* mRNA, the fixed oocytes were attached on slide glasses  
30 using Smear Gell (GenoStaff). The oocytes were immunostained with anti-GFP mouse  
31 antibody (1:200 dilution; Roche) followed by anti-mouse IgG-Alexa Fluor 488 antibody  
32 (1:200 dilution; Molecular Probes) after hybridization and washing of the *Cyclin B1* or  
33 *Mad2* RNA probe in *in situ* hybridization analysis.



1 To analyze the effects of permeabilization on GFP-Pum1 aggregates, the oocytes  
2 injected with mRNA encoding GFP or GFP-Pum1 were incubated for overnight at 37°C  
3 with M2 medium containing 10  $\mu$ M milrinone. After observation under the LSM 5  
4 LIVE confocal microscope, the oocytes were transferred to M2 medium containing  
5 0.012% digitonin and 10  $\mu$ M milrinone. The oocytes were then observed under the  
6 confocal microscope at the appropriate time points.

7 To analyze the effects of GFP-Pum1  $\Delta$ C on oocyte maturation, the oocytes injected  
8 with mRNA encoding GFP or GFP-Pum1  $\Delta$ C were incubated for 18 h at 37°C with M2  
9 medium and then fixed with 4% PFA/PBS for 1 h at 37°C. The samples were  
10 permeabilized with PBS containing 0.1% Triton-X100 for 20 min, followed by  
11 incubation with a blocking/washing solution (PBS containing 0.3% BSA and 0.01%  
12 Tween20) for 1 h at room temperature. The samples were then incubated with Cy3-  
13 conjugated anti- $\beta$ -tubulin antibody (1:150 dilution; Sigma) for 30 min at room  
14 temperature, washed with washing solution, and mounted with VECTASHIELD  
15 Mounting Medium with DAPI (Funakoshi). The samples were observed under the LSM  
16 5 LIVE confocal microscope.

17

### 18 **FRAP analysis**

19 FRAP measurements were performed according to the procedure reported previously  
20 (Kimura and Cook, 2001; Tsutsumi et al., 2016). A Nikon Ti-E inverted microscope  
21 equipped with a Nikon A1Rsi special imaging confocal laser scanning system (Nikon)  
22 was used for the measurements. A small area (approximately 10  $\mu$ m diameter circle)  
23 was positioned in a region of the oocyte cytoplasm and bleached using 100% 488 nm  
24 laser with 5 scans. Images were then collected using 1.0% laser power every 5.0 s for  
25 5.0 min. The relative fluorescence intensity in the bleached area was normalized using  
26 the intensity in the control area measured subsequently after measurement of the  
27 bleached area. The normalized intensities were analyzed using a fitting equation for a  
28 double exponential association model. A smaller bleached area (5  $\mu$ m diameter circle)  
29 gave equivalent results.

30

### 31 **Puromycin treatment and Pum1 antibody injection**

32 To inhibit protein synthesis, oocytes were treated with 20 mM puromycin in M2  
33 medium and incubated at 37°C. The oocytes were collected at appropriate time points

1 after incubation with puromycin for immunoblotting analysis. Two pg of anti-Pum1  
2 antibody was injected into fully grown mouse oocytes using the microinjector in M2  
3 medium containing 10  $\mu$ M milrinone. The oocytes were then washed three times and  
4 incubated for 18 h at 37°C with M2 medium containing 1  $\mu$ M milrinone. To analyze the  
5 distribution of GFP-Pum1, 10 pg of the GFP-Pum1 mRNA was co-injected with 2 pg of  
6 anti-Pum1 antibody into fully grown mouse oocytes, followed by washing and  
7 incubation of oocytes as described above. The distribution of GFP-Pum1 was observed  
8 under the LSM 5 LIVE confocal microscope.

9

### 10 **Phosphatase treatment**

11 The dephosphorylation experiments were performed according to the procedure  
12 reported previously (Pahlavan et al., 2000). Briefly, samples of 30 oocytes in  
13 phosphatase buffer (New England Biolabs) containing 1% SDS, 100  $\mu$ M (*p*-  
14 amidinophenyl)methanesulfonyl fluoride, and 3  $\mu$ g/ml leupeptin were incubate with  
15 17.5 U alkaline phosphatase (New England Biolabs) at 37°C for 1 h. The reaction was  
16 stopped by adding the equal volume of LDS sample buffer. The samples were then  
17 analyzed by immunoblotting.

18

### 19 **Okadaic acid, BI2536, and centrinone treatment**

20 To inhibit activities of protein phosphatase 1 and 2A, oocytes were treated with 2.5  $\mu$ M  
21 okadaic acid (OA) in M2 medium containing 10  $\mu$ M milrinone and incubated at 37°C.  
22 OA was dissolved in DMSO as stocks and diluted in M2 medium before use. As a  
23 control, oocytes were treated with DMSO. The oocytes were collected at 16 h after  
24 incubation for immunoblotting analysis. To analyze the distribution of GFP-Pum1, fully  
25 grown mouse oocytes were injected with 10 pg of the GFP-Pum1 mRNA and incubated  
26 in M2 medium containing 10  $\mu$ M milrinone at 37°C for 4 h, followed by treatment with  
27 OA as described above. The distribution of GFP-Pum1 was observed under the LSM 5  
28 LIVE confocal microscope. Activities of Plk1 and Plk4 were inhibited by treating the  
29 oocytes with 100 nM BI2536 and 5  $\mu$ M centrinone, respectively, according to the  
30 procedure reported previously (Bury et al., 2017).

31

### 32 **Acknowledgements**

33 We thank Drs. K. Kobayashi and M. Tsutsumi for technical advice on FRAP analysis.



1 We also thank Dr. H. Maita for advice on the detection of PCR amplification in the PAT  
2 assay. This work was supported by Grant-in-Aid for Scientific Research (16K07242 to  
3 T.K.) from the Ministry of Education, Culture, Sports, Science and Technology, Japan  
4 and was in part supported by grants from Takeda Science Foundation, Daiichi Sankyo  
5 Foundation of Life Science, Suhara Memorial Foundation, and JSPS KAKENHI Grant  
6 Number JP16H06280.

7

#### 8 **Author contributions**

9 Conceptualization: N. Takei, Y. Takada, S. Kawamura and T. Kotani. Investigation: N.  
10 Takei, S. Kawamura, Y. Takada and A. Saitoh. Resources: J. Bormann, W.S. Yuen and J.  
11 Carroll. Project administration: T. Kotani. Writing - original draft: T. Kotani. Writing -  
12 review and editing: J. Carroll and T. Kotani.

13

#### 14 **Conflict of interest**

15 The authors declare that no competing interests exist.

16

#### 17 **References**

- 18 Asaoka-Taguchi, M., M. Yamada, A. Nakamura, K. Hanyu, and S. Kobayashi. 1999.  
19 Maternal Pumilio acts together with Nanos in germline development in  
20 *Drosophila* embryos. *Nature Cell Biology* **1**:431-437.
- 21 Barkoff, A.F., K.S. Dickson, N.K. Gray, and M. Wickens. 2000. Translational control of  
22 cyclin B1 mRNA during meiotic maturation: coordinated repression and  
23 cytoplasmic polyadenylation. *Developmental Biology* **220**:97-109.
- 24 Brangwynne, C.P., C.R. Eckmann, D.S. Courson, A. Rybarska, C. Hoegge, J.  
25 Gharakhani, F. Julicher, and A.A. Hyman. 2009. Germline P granules are liquid  
26 droplets that localize by controlled dissolution/condensation. *Science* **324**:1729-  
27 1732.
- 28 Bury, L., P.A. Coelho, A. Simeone, S. Ferries, C.E. Eyers, P.A. Eyers, M. Zernicka-  
29 Goetz, and D.M. Glover. 2017. Plk4 and Aurora A cooperate in the initiation of  
30 acentriolar spindle assembly in mammalian oocytes. *The Journal of Cell Biology*  
31 **216**:3571-3590.
- 32 Buxbaum, A.R., G. Haimovich, and R.H. Singer. 2015. In the right place at the right  
33 time: visualizing and understanding mRNA localization. *Nature Reviews*

- 1           *Molecular Cell Biology* **16**:95-109.
- 2   Chen, D., W. Zheng, A. Lin, K. Uyhazi, H. Zhao, and H. Lin. 2012. Pumilio 1  
3           suppresses multiple activators of p53 to safeguard spermatogenesis. *Current*  
4           *Biology* **22**:420-425.
- 5   Chen, J., C. Melton, N. Suh, J.S. Oh, K. Horner, F. Xie, C. Sette, R. Blelloch, and M.  
6           Conti. 2011. Genome-wide analysis of translation reveals a critical role for  
7           deleted in azoospermia-like (Dazl) at the oocyte-to-zygote transition. *Genes &*  
8           *Development* **25**:755-766.
- 9   Davydenko, O., R.M. Schultz, and M.A. Lampson. 2013. Increased CDK1 activity  
10           determines the timing of kinetochore-microtubule attachments in meiosis I. *The*  
11           *Journal of Cell Biology* **202**:221-229.
- 12   de Moor, C.H., H. Meijer, and S. Lissenden. 2005. Mechanisms of translational control  
13           by the 3' UTR in development and differentiation. *Seminars in Cell &*  
14           *Developmental Biology* **16**:49-58.
- 15   de Moor, C.H., and J.D. Richter. 1999. Cytoplasmic polyadenylation elements mediate  
16           masking and unmasking of cyclin B1 mRNA. *The EMBO Journal* **18**:2294-  
17           2303.
- 18   Decker, C.J., D. Teixeira, and R. Parker. 2007. Edc3p and a glutamine/asparagine-rich  
19           domain of Lsm4p function in processing body assembly in *Saccharomyces*  
20           *cerevisiae*. *The Journal of Cell Biology* **179**:437-449.
- 21   Doyle, M., and M.A. Kiebler. 2011. Mechanisms of dendritic mRNA transport and its  
22           role in synaptic tagging. *The EMBO Journal* **30**:3540-3552.
- 23   Elbaum-Garfinkle, S., Y. Kim, K. Szczepaniak, C.C. Chen, C.R. Eckmann, S. Myong,  
24           and C.P. Brangwynne. 2015. The disordered P granule protein LAF-1 drives  
25           phase separation into droplets with tunable viscosity and dynamics. *PNAS*  
26           **112**:7189-7194.
- 27   Gallo, C.M., J.T. Wang, F. Motegi, and G. Seydoux. 2010. Cytoplasmic partitioning of P  
28           granule components is not required to specify the germline in *C. elegans*.  
29           *Science* **330**:1685-1689.
- 30   Gebauer, F., W. Xu, G.M. Cooper, and J.D. Richter. 1994. Translational control by  
31           cytoplasmic polyadenylation of c-mos mRNA is necessary for oocyte maturation  
32           in the mouse. *The EMBO Journal* **13**:5712-5720.
- 33   Gennarino, V.A., R.K. Singh, J.J. White, A. De Maio, K. Han, J.Y. Kim, P. Jafar-Nejad,

- 1 A. di Ronza, H. Kang, L.S. Sayegh, T.A. Cooper, H.T. Orr, R.V. Sillitoe, and  
2 H.Y. Zoghbi. 2015. Pumilio1 haploinsufficiency leads to SCA1-like  
3 neurodegeneration by increasing wild-type Ataxin1 levels. *Cell* **160**:1087-1098.
- 4 Gilks, N., N. Kedersha, M. Ayodele, L. Shen, G. Stoecklin, L.M. Dember, and P.  
5 Anderson. 2004. Stress granule assembly is mediated by prion-like aggregation  
6 of TIA-1. *Molecular Biology of the Cell* **15**:5383-5398.
- 7 Hochegger, H., A. Klotzbucher, J. Kirk, M. Howell, K. le Guellec, K. Fletcher, T.  
8 Duncan, M. Sohail, and T. Hunt. 2001. New B-type cyclin synthesis is required  
9 between meiosis I and II during *Xenopus* oocyte maturation. *Development*  
10 **128**:3795-3807.
- 11 Homer, H.A., A. McDougall, M. Levasseur, K. Yallop, A.P. Murdoch, and M. Herbert.  
12 2005. Mad2 prevents aneuploidy and premature proteolysis of cyclin B and  
13 securin during meiosis I in mouse oocytes. *Genes & Development* **19**:202-207.
- 14 Jain, S., J.R. Wheeler, R.W. Walters, A. Agrawal, A. Barsic, and R. Parker. 2016.  
15 ATPase-Modulated Stress Granules Contain a Diverse Proteome and  
16 Substructure. *Cell* **164**:487-498.
- 17 Kimura, H., and P.R. Cook. 2001. Kinetics of core histones in living human cells: little  
18 exchange of H3 and H4 and some rapid exchange of H2B. *The Journal of Cell*  
19 *Biology* **153**:1341-1353.
- 20 Kondo, T., T. Kotani, and M. Yamashita. 2001. Dispersion of cyclin B mRNA  
21 aggregation is coupled with translational activation of the mRNA during  
22 zebrafish oocyte maturation. *Developmental Biology* **229**:421-431.
- 23 Kotani, T., K. Maehata, and N. Takei. 2017. Regulation of Translationally Repressed  
24 mRNAs in Zebrafish and Mouse Oocytes. *Results and Problems in Cell*  
25 *Differentiation* **63**:297-324.
- 26 Kotani, T., and M. Yamashita. 2002. Discrimination of the roles of MPF and MAP  
27 kinase in morphological changes that occur during oocyte maturation.  
28 *Developmental Biology* **252**:271-286.
- 29 Kotani, T., K. Yasuda, R. Ota, and M. Yamashita. 2013. Cyclin B1 mRNA translation is  
30 temporally controlled through formation and disassembly of RNA granules. *The*  
31 *Journal of Cell Biology* **202**:1041-1055.
- 32 Lancaster, A.K., A. Nutter-Upham, S. Lindquist, and O.D. King. 2014. PLAAC: a web  
33 and command-line application to identify proteins with prion-like amino acid

- 1 composition. *Bioinformatics* **30**:2501-2502.
- 2 Ledan, E., Z. Polanski, M.E. Terret, and B. Maro. 2001. Meiotic maturation of the  
3 mouse oocyte requires an equilibrium between cyclin B synthesis and  
4 degradation. *Developmental Biology* **232**:400-413.
- 5 Lee, C.D., and B.P. Tu. 2015. Glucose-Regulated Phosphorylation of the PUF Protein  
6 Puf3 Regulates the Translational Fate of Its Bound mRNAs and Association  
7 with RNA Granules. *Cell Reports* **11**:1638-1650.
- 8 Lehmann, R., and C. Nussleinvolhard. 1987. Involvement of the Pumilio Gene in the  
9 Transport of an Abdominal Signal in the Drosophila Embryo. *Nature* **329**:167-  
10 170.
- 11 Li, Y.R., O.D. King, J. Shorter, and A.D. Gitler. 2013. Stress granules as crucibles of  
12 ALS pathogenesis. *The Journal of Cell Biology* **201**:361-372.
- 13 Lin, Y., D.S.W. Protter, M.K. Rosen, and R. Parker. 2015. Formation and Maturation of  
14 Phase-Separated Liquid Droplets by RNA-Binding Proteins. *Molecular Cell*  
15 **60**:208-219.
- 16 Maharana, S., J. Wang, D.K. Papadopoulos, D. Richter, A. Pozniakovsky, I. Poser, M.  
17 Bickle, S. Rizk, J. Guillen-Boixet, T.M. Franzmann, M. Jahnel, L. Marrone, Y.T.  
18 Chang, J. Sternecker, P. Tomancak, A.A. Hyman, and S. Alberti. 2018. RNA  
19 buffers the phase separation behavior of prion-like RNA binding proteins.  
20 *Science* **360**:918-921.
- 21 Mak, W., C. Fang, T. Holden, M.B. Dratver, and H. Lin. 2016. An Important Role of  
22 Pumilio 1 in Regulating the Development of the Mammalian Female Germline.  
23 *Biology of Reproduction* **94**:134.
- 24 Martin, K.C., and A. Ephrussi. 2009. mRNA localization: gene expression in the spatial  
25 dimension. *Cell* **136**:719-730.
- 26 Masui, Y., and H.J. Clarke. 1979. Oocyte maturation. *International Review of Cytology*  
27 **57**:185-282.
- 28 McGrew, L.L., E. Dworkin-Rastl, M.B. Dworkin, and J.D. Richter. 1989. Poly(A)  
29 elongation during *Xenopus* oocyte maturation is required for translational  
30 recruitment and is mediated by a short sequence element. *Genes & Development*  
31 **3**:803-815.
- 32 Mendez, R., and J.D. Richter. 2001. Translational control by CPEB: a means to the end.  
33 *Nature Reviews Molecular Cell Biology* **2**:521-529.

- 1 Molliex, A., J. Temirov, J. Lee, M. Coughlin, A.P. Kanagaraj, H.J. Kim, T. Mittag, and  
2 J.P. Taylor. 2015. Phase separation by low complexity domains promotes stress  
3 granule assembly and drives pathological fibrillization. *Cell* **163**:123-133.
- 4 Murata, Y., and R.P. Wharton. 1995. Binding of pumilio to maternal hunchback mRNA  
5 is required for posterior patterning in *Drosophila* embryos. *Cell* **80**:747-756.
- 6 Nakahata, S., T. Kotani, K. Mita, T. Kawasaki, Y. Katsu, Y. Nagahama, and M.  
7 Yamashita. 2003. Involvement of *Xenopus* Pumilio in the translational  
8 regulation that is specific to cyclin B1 mRNA during oocyte maturation.  
9 *Mechanisms of Development* **120**:865-880.
- 10 Nott, T.J., E. Petsalaki, P. Farber, D. Jarvis, E. Fussner, A. Plochowitz, T.D. Craggs,  
11 D.P. Bazett-Jones, T. Pawson, J.D. Forman-Kay, and A.J. Baldwin. 2015. Phase  
12 transition of a disordered nuage protein generates environmentally responsive  
13 membraneless organelles. *Molecular Cell* **57**:936-947.
- 14 Ota, R., T. Kotani, and M. Yamashita. 2011. Biochemical characterization of Pumilio1  
15 and Pumilio2 in *Xenopus* oocytes. *The Journal of Biological Chemistry*  
16 **286**:2853-2863.
- 17 Pahlavan, G., Z. Polanski, P. Kalab, R. Golsteyn, E.A. Nigg, and B. Maro. 2000.  
18 Characterization of polo-like kinase 1 during meiotic maturation of the mouse  
19 oocyte. *Developmental Biology* **220**:392-400.
- 20 Pique, M., J.M. Lopez, S. Foissac, R. Guigo, and R. Mendez. 2008. A combinatorial  
21 code for CPE-mediated translational control. *Cell* **132**:434-448.
- 22 Polanski, Z., E. Ledan, S. Brunet, S. Louvet, M.H. Verlhac, J.Z. Kubiak, and B. Maro.  
23 1998. Cyclin synthesis controls the progression of meiotic maturation in mouse  
24 oocytes. *Development* **125**:4989-4997.
- 25 Radford, H.E., H.A. Meijer, and C.H. de Moor. 2008. Translational control by  
26 cytoplasmic polyadenylation in *Xenopus* oocytes. *Biochimica et Biophysica*  
27 *Acta* **1779**:217-229.
- 28 Reijns, M.A., R.D. Alexander, M.P. Spiller, and J.D. Beggs. 2008. A role for Q/N-rich  
29 aggregation-prone regions in P-body localization. *Journal of Cell Science*  
30 **121**:2463-2472.
- 31 Saitoh, A., Y. Takada, M. Horie, and T. Kotani. 2018. Pumilio1 phosphorylation  
32 precedes translational activation of its target mRNA in zebrafish oocytes. *Zygote*  
33 **26**:372-380.

- 1 Salazar, A.M., E.J. Silverman, K.P. Menon, and K. Zinn. 2010. Regulation of synaptic  
2 Pumilio function by an aggregation-prone domain. *The Journal of Neuroscience*  
3 **30**:515-522.
- 4 Sheets, M.D., C.A. Fox, T. Hunt, G. Vande Woude, and M. Wickens. 1994. The 3'-  
5 untranslated regions of c-mos and cyclin mRNAs stimulate translation by  
6 regulating cytoplasmic polyadenylation. *Genes & Development* **8**:926-938.
- 7 Shiina, N. 2019. Liquid- and solid-like RNA granules form through specific scaffold  
8 proteins and combine into biphasic granules. *The Journal of Biological*  
9 *Chemistry* **294**:3532-3548.
- 10 Smith, G.D., A. Sadhu, S. Mathies, and D.P. Wolf. 1998. Characterization of protein  
11 phosphatases in mouse oocytes. *Developmental Biology* **204**:537-549.
- 12 Souquere, S., G. Beauclair, F. Harper, A. Fox, and G. Pierron. 2010. Highly ordered  
13 spatial organization of the structural long noncoding NEAT1 RNAs within  
14 paraspeckle nuclear bodies. *Molecular Biology of the Cell* **21**:4020-4027.
- 15 Spassov, D.S., and R. Jurecic. 2003. The PUF family of RNA-binding proteins: does  
16 evolutionarily conserved structure equal conserved function? *IUBMB Life*  
17 **55**:359-366.
- 18 Susor, A., D. Jansova, R. Cerna, A. Danylevska, M. Anger, T. Toralova, R. Malik, J.  
19 Supolikova, M.S. Cook, J.S. Oh, and M. Kubelka. 2015. Temporal and spatial  
20 regulation of translation in the mammalian oocyte via the mTOR-eIF4F  
21 pathway. *Nature Communications* **6**:6078.
- 22 Takei, N., T. Nakamura, S. Kawamura, Y. Takada, Y. Satoh, A.P. Kimura, and T. Kotani.  
23 2018. High-Sensitivity and High-Resolution In Situ Hybridization of Coding  
24 and Long Non-coding RNAs in Vertebrate Ovaries and Testes. *Biological*  
25 *Procedures Online* **20**:6.
- 26 Tay, J., R. Hodgman, and J.D. Richter. 2000. The control of cyclin B1 mRNA  
27 translation during mouse oocyte maturation. *Developmental Biology* **221**:1-9.
- 28 Trcek, T., M. Grosch, A. York, H. Shroff, T. Lionnet, and R. Lehmann. 2015. Drosophila  
29 germ granules are structured and contain homotypic mRNA clusters. *Nature*  
30 *Communications* **6**:7962.
- 31 Tsutsumi, M., H. Muto, S. Myoba, M. Kimoto, A. Kitamura, M. Kamiya, T. Kikukawa,  
32 S. Takiya, M. Demura, K. Kawano, M. Kinjo, and T. Aizawa. 2016. In vivo  
33 fluorescence correlation spectroscopy analyses of FMBP-1, a silkworm

- 1 transcription factor. *FEBS Open Bio* **6**:106-125.
- 2 Vogler, T.O., J.R. Wheeler, E.D. Nguyen, M.P. Hughes, K.A. Britson, E. Lester, B. Rao,  
3 N.D. Betta, O.N. Whitney, T.E. Ewachiw, E. Gomes, J. Shorter, T.E. Lloyd, D.S.  
4 Eisenberg, J.P. Taylor, A.M. Johnson, B.B. Olwin, and R. Parker. 2018. TDP-43  
5 and RNA form amyloid-like myo-granules in regenerating muscle. *Nature*  
6 **563**:508-513.
- 7 Wang, J.T., J. Smith, B.C. Chen, H. Schmidt, D. Rasoloson, A. Paix, B.G. Lambrus, D.  
8 Calidas, E. Betzig, and G. Seydoux. 2014. Regulation of RNA granule dynamics  
9 by phosphorylation of serine-rich, intrinsically disordered proteins in *C. elegans*.  
10 *eLife* **3**:e04591.
- 11 Weber, S.C., and C.P. Brangwynne. 2012. Getting RNA and protein in phase. *Cell*  
12 **149**:1188-1191.
- 13 West, J.A., M. Mito, S. Kurosaka, T. Takumi, C. Tanegashima, T. Chujo, K. Yanaka,  
14 R.E. Kingston, T. Hirose, C. Bond, A. Fox, and S. Nakagawa. 2016. Structural,  
15 super-resolution microscopy analysis of paraspeckle nuclear body organization.  
16 *The Journal of Cell Biology* **214**:817-830.
- 17 Wheeler, J.R., T. Matheny, S. Jain, R. Abrisch, and R. Parker. 2016. Distinct stages in  
18 stress granule assembly and disassembly. *eLife* **5**:e18413.
- 19 Wickens, M., D.S. Bernstein, J. Kimble, and R. Parker. 2002. A PUF family portrait:  
20 3'UTR regulation as a way of life. *Trends in Genetics* **18**:150-157.
- 21 Zhang, B., M. Gallegos, A. Puoti, E. Durkin, S. Fields, J. Kimble, and M.P. Wickens.  
22 1997. A conserved RNA-binding protein that regulates sexual fates in the *C.*  
23 *elegans* hermaphrodite germ line. *Nature* **390**:477-484.
- 24 Zhang, M., D. Chen, J. Xia, W. Han, X. Cui, N. Neuenkirchen, G. Hermes, N. Sestan,  
25 and H. Lin. 2017. Post-transcriptional regulation of mouse neurogenesis by  
26 Pumilio proteins. *Genes & Development* **31**:1-16.
- 27
- 28



1 **Figure legends**

2 **Figure 1.** Expression and translational regulation of *Mad2* mRNA in mouse oocytes.  
3 (A, top) RT-PCR amplification for *Mad2* mRNA in the mouse ovary and oocyte. Similar  
4 results were obtained from three independent experiments. (bottom) Schematic views of  
5 long and short *Mad2* mRNAs. (B) Detection of *Mad2* mRNA in oocytes by *in situ*  
6 hybridization. Similar results were obtained from three independent experiments. (C)  
7 FISH analysis of *Mad2* mRNA (green). DNA is shown in blue. Similar results were  
8 obtained from three independent experiments. (D, left) Immunoblotting of *Mad2*,  
9 *Cyclin B1* and *Pum1* in oocytes at 0, 10, and 18 h after resumption of meiosis. (right)  
10 Quantitative analysis (mean  $\pm$  SD; n = 3). *t*-test: \**P* < 0.05, \*\**P* < 0.01. (E) Poly(A) tail  
11 analysis of *Mad2* and *Cyclin B1* mRNAs in oocytes at 0, 4, and 18 h after resumption of  
12 meiosis. Similar results were obtained from three independent experiments. GV,  
13 germinal vesicle; fc, follicle cells. Bars: 20  $\mu$ m.

14  
15 **Figure 2.** Interaction with *Pum1* and cytoplasmic regulation of *Mad2* mRNA in mouse  
16 oocytes. (A, top) Semi-quantitative RT-PCR of ovary extracts before IP (Initial) and IP  
17 with goat IgG (IgG) or anti-*Pum1* goat antibody ( $\alpha$ -*Pum1*) for *Cyclin B1*, *Mad2*,  $\alpha$ -  
18 *tubulin*, and  $\beta$ -*actin* transcripts. (bottom) Quantitative analysis (mean  $\pm$  SD; n = 3). *t*-  
19 test: \*\**P* < 0.01. (B) FISH analysis of *Mad2* (green) and *Cyclin B1* (red) mRNAs in a  
20 mouse oocyte. DNA is shown in blue. (insets) Enlarged views of the boxed region.  
21 Arrows indicate *Mad2* and *Cyclin B1* RNA granules distributed closely to each other.  
22 Similar results were obtained from three independent experiments. (C) FISH analysis of  
23 oocytes at 0, 4, and 18 h after resumption of meiosis. (D) The numbers of RNA granules  
24 per 100  $\mu$ m<sup>2</sup> in individual oocytes at 0, 4, and 18 h were counted (mean  $\pm$  SD). The  
25 numbers in parentheses indicate the total numbers of oocytes analyzed. *t*-test: \*\**P* <  
26 0.01. GV, germinal vesicle; fc, follicle cells; PB, polar body. Bars: 20  $\mu$ m.

27  
28 **Figure 3.** Formation of *Pum1* aggregates that surround *Cyclin B1* and *Mad2* RNA  
29 granules. (A, left) Immunofluorescence of *Pum1* in immature oocytes. DNA is shown in  
30 blue. (right) An enlarged view of the boxed region. Similar results were obtained from  
31 three independent experiments. (B) FISH analysis of *Cyclin B1* (blue) and *Mad2* (green)  
32 mRNAs and immunostaining of *Pum1* (magenta) in immature oocytes. Arrows indicate  
33 *Pum1* aggregates surrounding *Cyclin B1* and *Mad2* RNA granules. Similar results were



1 obtained from three independent experiments. (C) Distributions of GFP-Pum1 (top) and  
2 GFP-Pum1  $\Delta$ QN (bottom). Images in a bright field are shown on the right. (D, left) A  
3 high-resolution image of GFP-Pum1. (right) An enlarged view of the boxed region.  
4 Similar results were obtained from six independent experiments. (E) Schematic  
5 diagrams of Pum1, Pum1  $\Delta$ QN, Pum1  $\Delta$ N, and Pum1  $\Delta$ C. GV, germinal vesicle. Bars: 20  
6  $\mu$ m in A (left) and C, 2  $\mu$ m in A (right), B and D.

7

8 **Figure 4.** Solid-like properties of Pum1 in immature oocytes. (A, left)

9 Ultracentrifugation analysis of Pum1. Immature (Im) and mature (M) zebrafish oocytes  
10 were centrifuged, and the supernatant (S) and pellet (P) equivalent to one oocyte were  
11 analyzed by immunoblotting. GM130 is a Golgi matrix protein. (right) Quantitative  
12 analysis of Pum1 and GM130 (means  $\pm$  SD; n = 3). (B) FRAP analysis of GFP-Pum1  
13 (Pum1) and GFP-Pum1  $\Delta$ QN ( $\Delta$ QN) in immature mouse oocytes. Fluorescence recovery  
14 curves for GFP-Pum1 (n = 12) and GFP-Pum1  $\Delta$ QN (n = 14) are shown (mean  $\pm$  SD).  
15 (C) Values of  $t_{1/2}$  (left) and percentages of immobile fractions of GFP-Pum1 and GFP-  
16 Pum1  $\Delta$ QN (right). *t*-test:  $**P < 0.01$ . (D) Time course of GFP and GFP-Pum1 after  
17 permeabilization with digitonin. Similar results were obtained in 11 oocytes from two  
18 independent experiments. Bars: 20  $\mu$ m. (E) Quantitative analysis of fluorescence  
19 intensity in D (mean  $\pm$  SD; n = 3).

20

21 **Figure 5.** Solid-like properties of Pum1 are changed during oocyte maturation. (A)

22 Time course of GFP-Pum1 at 0, 2, 4 and 18 h after resumption of meiosis. Similar  
23 results were obtained from six independent experiments. GV, germinal vesicle. Bars: 20  
24  $\mu$ m. (B) FRAP analysis of GFP-Pum1 in immature and mature mouse oocytes.  
25 Fluorescence recovery curves in immature (n = 12) and mature (n = 6) oocytes are  
26 shown (mean  $\pm$  SD). (C) Values of half time of recovery ( $t_{half}$ ) (left) and percentages of  
27 immobile fractions of GFP-Pum1 (right) in immature (Im) and mature (M) oocytes. *t*-  
28 test:  $**P < 0.01$ .

29

30 **Figure 6.** Stabilization of Pum1 aggregates prevents the translation of target mRNA.

31 (A) Distributions of GFP, GFP-Pum1  $\Delta$ N and GFP-Pum1  $\Delta$ C at 0 and 18 h after  
32 resumption of meiosis. (B) Percentages of oocytes not injected (-) and injected with  
33 GFP, GFP-Pum1 (Pum1), GFP-Pum1  $\Delta$ QN ( $\Delta$ QN), GFP-Pum1  $\Delta$ N ( $\Delta$ N), and GFP-

1 Pum1 $\Delta$ C ( $\Delta$ C) that extruded a polar body (means  $\pm$  SD; n = 3). The numbers in  
2 parentheses indicate the total numbers of oocytes analyzed. *t*-test relative to the oocytes  
3 injected with GFP: \*\**P* < 0.01. (C) Immunofluorescence of  $\beta$ -tubulin (red) in oocytes  
4 injected with GFP or GFP-Pum1 $\Delta$ C (Pum1 $\Delta$ C). DNA is shown in blue. Arrows indicate  
5 multiple poles. Similar results were obtained from three independent experiments. (D)  
6 Immunoblotting of Mad2, Cyclin B1 and  $\gamma$ -tubulin in oocytes not injected (-) and  
7 injected with GFP-Pum1 $\Delta$ C ( $\Delta$ C) 4 h after resumption of meiosis. Similar results were  
8 obtained from three independent experiments. (E) Percentages of oocytes incubated  
9 with (+) and without (-) puromycin (Puro) that induced GVBD. (F) Percentages of  
10 oocytes not injected (-) and injected with anti-Pum1 antibody ( $\alpha$ -Pum1) or control IgG  
11 (IgG) that induced GVBD (means  $\pm$  SD; n = 5). *t*-test: \**P* < 0.05. (G) Distribution of  
12 GFP-Pum1 in oocytes injected with anti-Pum1 antibody ( $\alpha$ -Pum1) or control IgG (IgG).  
13 (H) Distribution of the injected anti-Pum1 antibody (magenta). DNA is shown in blue.  
14 GV, germinal vesicle; PB, polar body. Bars: 20  $\mu$ m.

15

16 **Figure 7.** Phosphorylation of Pum1 triggers the dissolution of aggregates. (A)  
17 Phosphorylation of Pum1 (P-Pum1). (left) Immature (Im) and mature (M) oocytes were  
18 analyzed by immunoblotting. (right) Treatment with (+) and without (-) alkaline  
19 phosphatase (AP). Similar results were obtained from two independent experiments. (B)  
20 Pum1 phosphorylation in oocytes treated with OA (+) or DMSO (-). Arrowheads show  
21 nonspecific bands. Similar results were obtained from three independent experiments.  
22 (C) Time course of GFP-Pum1 in oocytes treated with DMSO, OA, or OA and Plk4  
23 inhibitor 0-120 min after treatment. Similar results were obtained from three  
24 independent experiments. (D) Quantitative analysis of Pum1 aggregates in oocytes  
25 treated with (+) and without (-) OA or Plk4 inhibitor. The numbers in parentheses  
26 indicate the total numbers of oocytes analyzed. *t*-test: \*\**P* < 0.01. (E) Pum1  
27 phosphorylation in oocytes at 60 min after treatment with (+) and without (-) OA or  
28 Plk4 inhibitor. The dotted line indicates the basal size of Pum1. GV, germinal vesicle.  
29 Bars: 20  $\mu$ m.

30

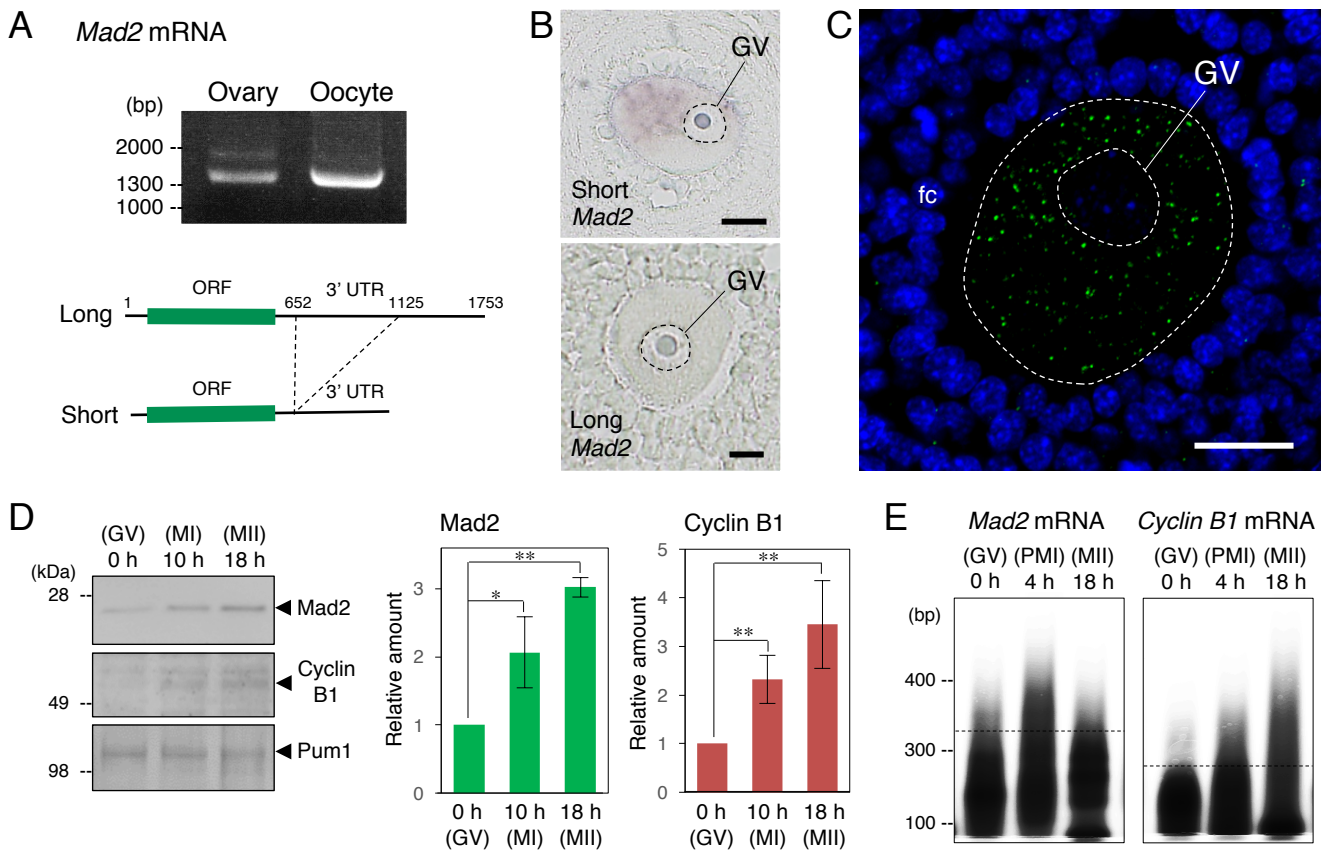

**Figure 1.** Expression and translational regulation of *Mad2* mRNA in mouse oocytes.

(A, top) RT-PCR amplification for *Mad2* mRNA in the mouse ovary and oocyte. Similar results were obtained from three independent experiments. (bottom) Schematic views of long and short *Mad2* mRNAs. (B) Detection of *Mad2* mRNA in oocytes by *in situ* hybridization. Similar results were obtained from three independent experiments. (C) FISH analysis of *Mad2* mRNA (green). DNA is shown in blue. Similar results were obtained from three independent experiments. (D, left) Immunoblotting of Mad2, Cyclin B1 and Pum1 in oocytes at 0, 10, and 18 h after resumption of meiosis. (right) Quantitative analysis (mean  $\pm$  SD; n = 3). *t*-test: \* $P$  < 0.05, \*\* $P$  < 0.01. (E) Poly(A) tail analysis of *Mad2* and *Cyclin B1* mRNAs in oocytes at 0, 4, and 18 h after resumption of meiosis. Similar results were obtained from three independent experiments. GV, germinal vesicle; fc, follicle cells. Bars: 20  $\mu$ m.

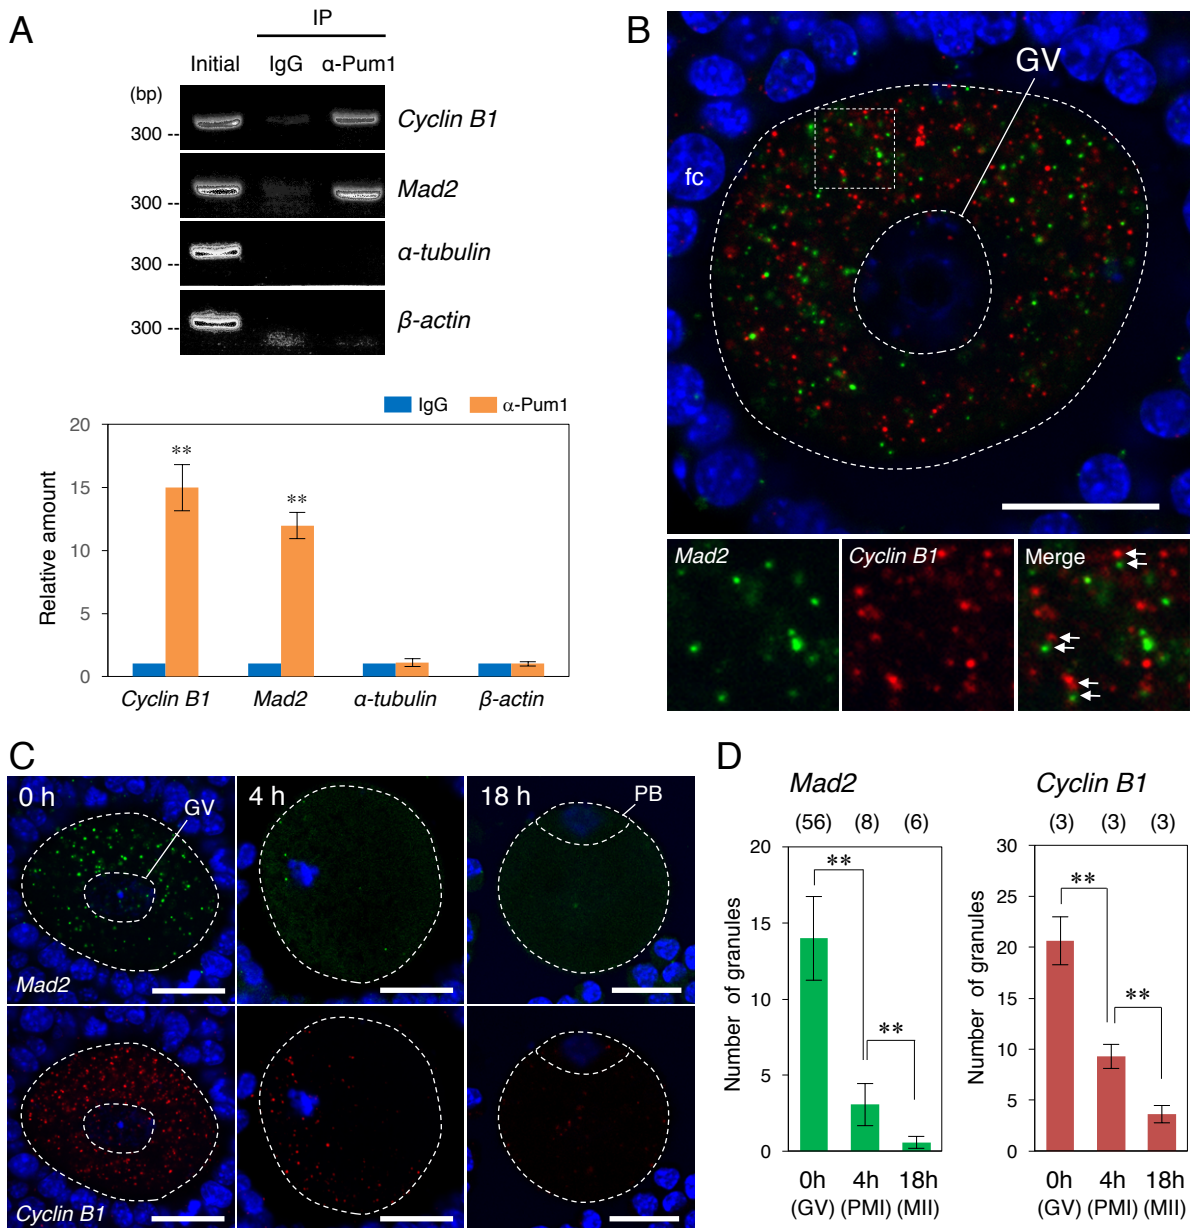

**Figure 2.** Interaction with Pum1 and cytoplasmic regulation of *Mad2* mRNA in mouse oocytes. **(A, top)** Semi-quantitative RT-PCR of ovary extracts before IP (Initial) and IP with goat IgG (IgG) or anti-Pum1 goat antibody ( $\alpha$ -Pum1) for *Cyclin B1*, *Mad2*,  $\alpha$ -*tubulin*, and  $\beta$ -*actin* transcripts. **(bottom)** Quantitative analysis (mean  $\pm$  SD;  $n = 3$ ). *t*-test:  $**P < 0.01$ . **(B)** FISH analysis of *Mad2* (green) and *Cyclin B1* (red) mRNAs in a mouse oocyte. DNA is shown in blue. (insets) Enlarged views of the boxed region. Arrows indicate *Mad2* and *Cyclin B1* RNA granules distributed closely to each other. Similar results were obtained from three independent experiments. **(C)** FISH analysis of oocytes at 0, 4, and 18 h after resumption of meiosis. **(D)** The numbers of RNA granules per 100  $\mu\text{m}^2$  in individual oocytes at 0, 4, and 18 h were counted (mean  $\pm$  SD). The numbers in parentheses indicate the total numbers of oocytes analyzed. *t*-test:  $**P < 0.01$ . GV, germinal vesicle; fc, follicle cells; PB, polar body. Bars: 20  $\mu\text{m}$ .



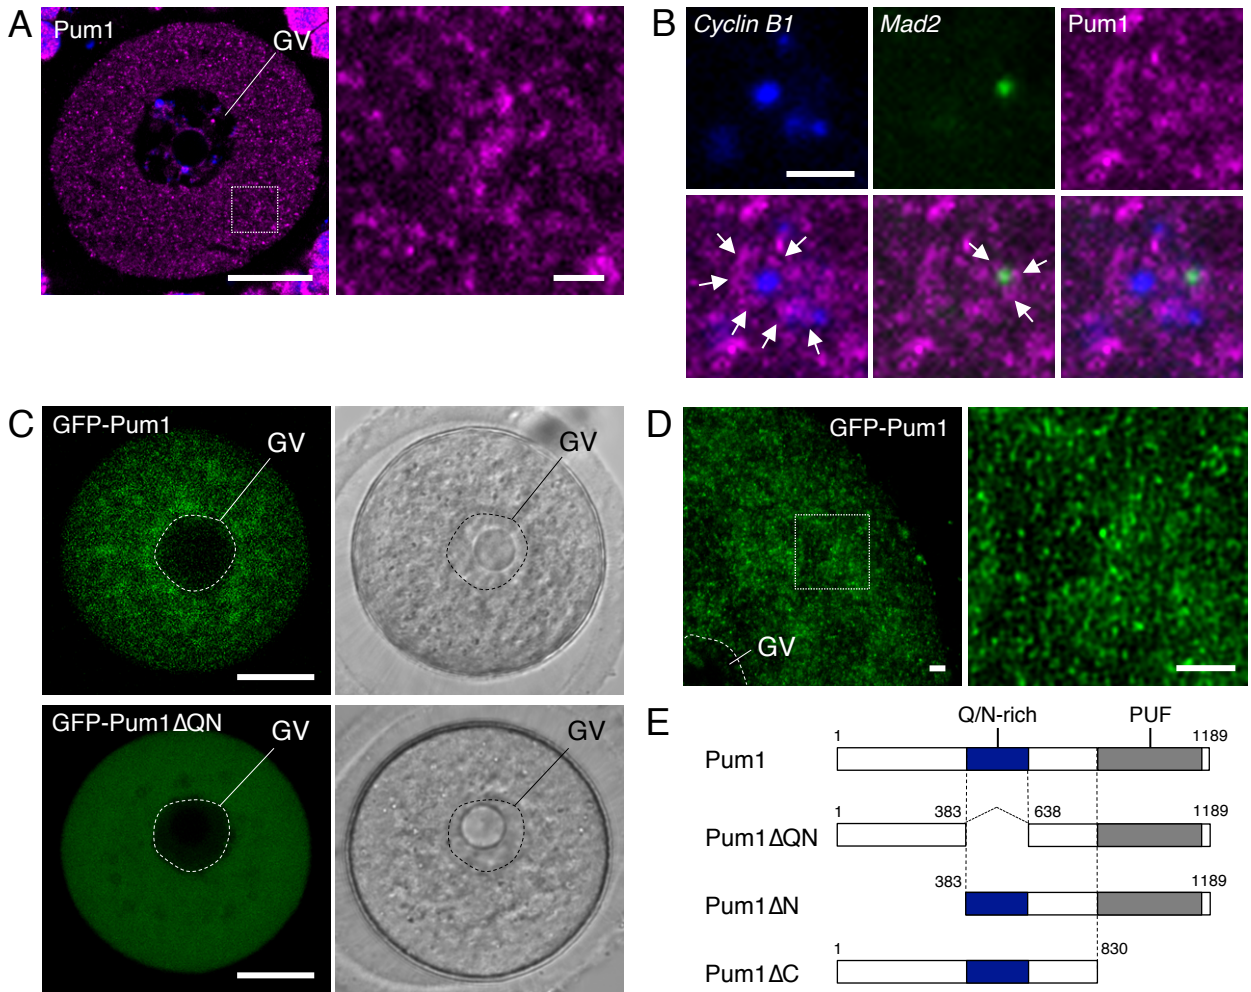

**Figure 3.** Formation of Pum1 aggregates that surround *Cyclin B1* and *Mad2* RNA granules. (A, left) Immunofluorescence of Pum1 in immature oocytes. DNA is shown in blue. (right) An enlarged view of the boxed region. Similar results were obtained from three independent experiments. (B) FISH analysis of *Cyclin B1* (blue) and *Mad2* (green) mRNAs and immunostaining of Pum1 (magenta) in immature oocytes. Arrows indicate Pum1 aggregates surrounding *Cyclin B1* and *Mad2* RNA granules. Similar results were obtained from three independent experiments. (C) Distributions of GFP-Pum1 (top) and GFP-Pum1  $\Delta$ QN (bottom). Images in a bright field are shown on the right. (D, left) A high-resolution image of GFP-Pum1. (right) An enlarged view of the boxed region. Similar results were obtained from six independent experiments. (E) Schematic diagrams of Pum1, Pum1  $\Delta$ QN, Pum1  $\Delta$ N, and Pum1  $\Delta$ C. GV, germinal vesicle. Bars: 20  $\mu$ m in A (left) and C, 2  $\mu$ m in A (right), B and D.

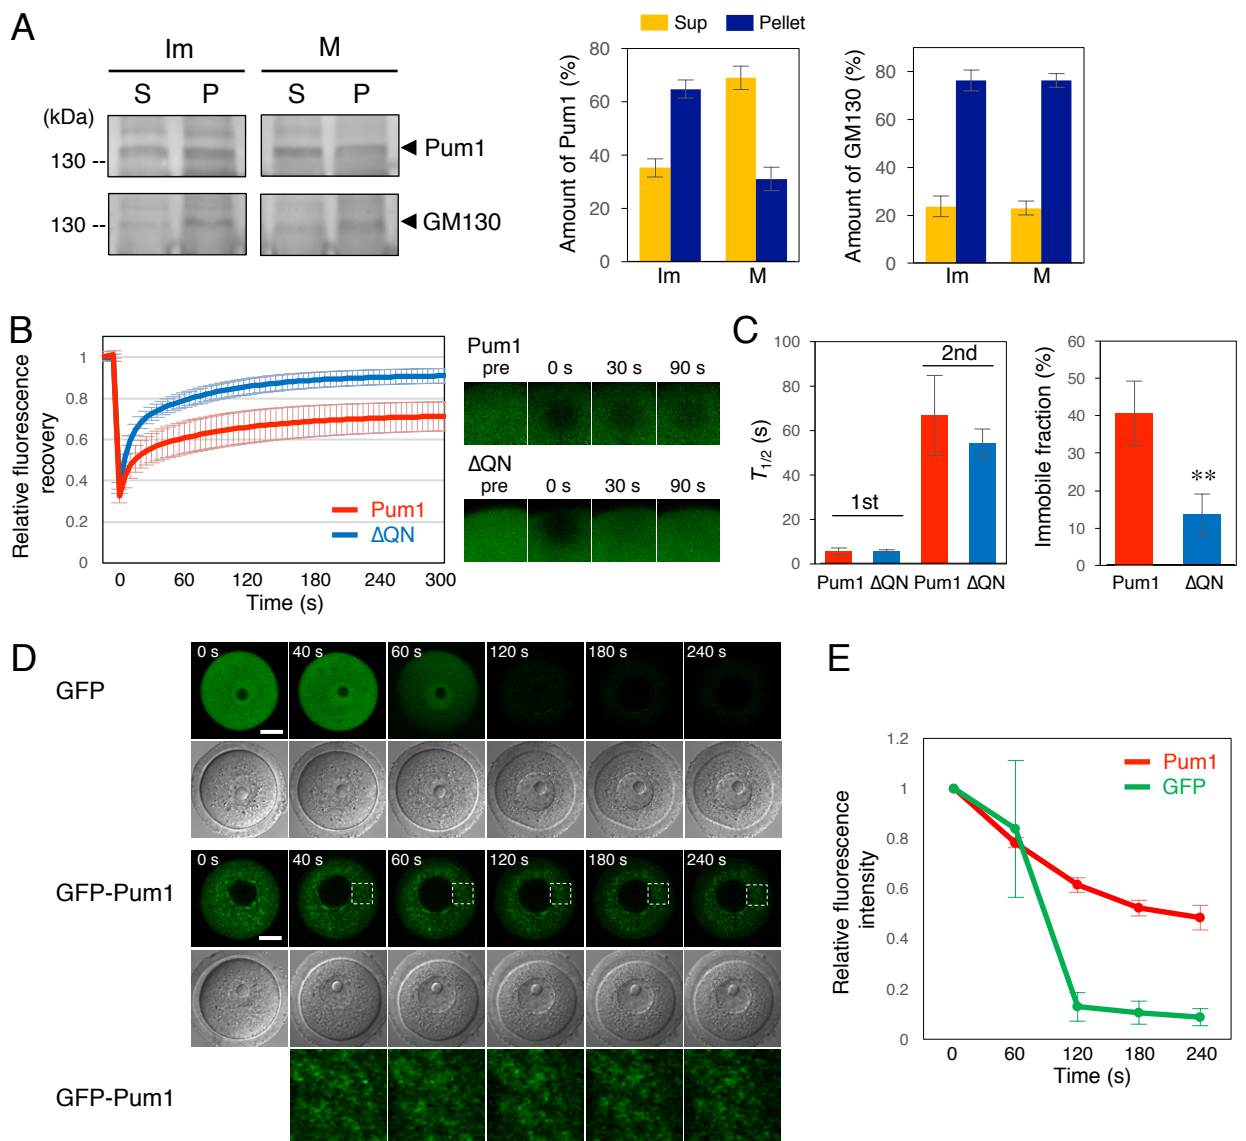

**Figure 4.** Solid-like properties of Pum1 in immature oocytes. (A, left)

Ultracentrifugation analysis of Pum1. Immature (Im) and mature (M) zebrafish oocytes were centrifuged, and the supernatant (S) and pellet (P) equivalent to one oocyte were analyzed by immunoblotting. GM130 is a Golgi matrix protein. (right) Quantitative analysis of Pum1 and GM130 (means  $\pm$  SD;  $n = 3$ ). (B) FRAP analysis of GFP-Pum1 (Pum1) and GFP-Pum1  $\Delta$ QN ( $\Delta$ QN) in immature mouse oocytes. Fluorescence recovery curves for GFP-Pum1 ( $n = 12$ ) and GFP-Pum1  $\Delta$ QN ( $n = 14$ ) are shown (mean  $\pm$  SD). (C) Values of  $t_{1/2}$  (left) and percentages of immobile fractions of GFP-Pum1 and GFP-Pum1  $\Delta$ QN (right).  $t$ -test:  $**P < 0.01$ . (D) Time course of GFP and GFP-Pum1 after permeabilization with digitonin. Similar results were obtained in 11 oocytes from two independent experiments. Bars:  $20 \mu\text{m}$ . (E) Quantitative analysis of fluorescence intensity in D (mean  $\pm$  SD;  $n = 3$ ).

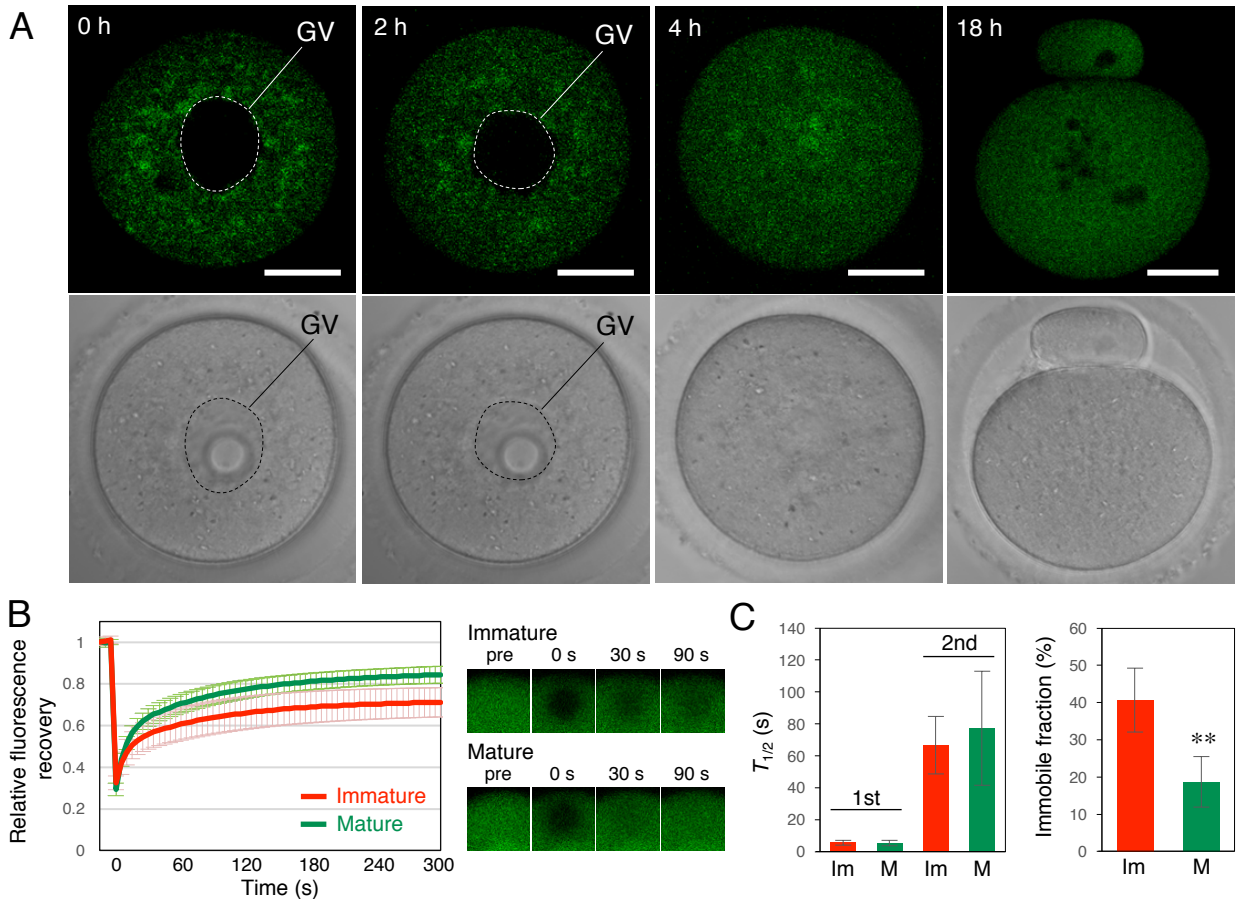

**Figure 5.** Solid-like properties of Pum1 are changed during oocyte maturation. **(A)** Time course of GFP-Pum1 at 0, 2, 4 and 18 h after resumption of meiosis. Similar results were obtained from six independent experiments. GV, germinal vesicle. Bars: 20  $\mu\text{m}$ . **(B)** FRAP analysis of GFP-Pum1 in immature and mature mouse oocytes. Fluorescence recovery curves in immature ( $n = 12$ ) and mature ( $n = 6$ ) oocytes are shown (mean  $\pm$  SD). **(C)** Values of half time of recovery ( $t_{1/2}$ ) (left) and percentages of immobile fractions of GFP-Pum1 (right) in immature (Im) and mature (M) oocytes.  $t$ -test: \*\* $P < 0.01$ .

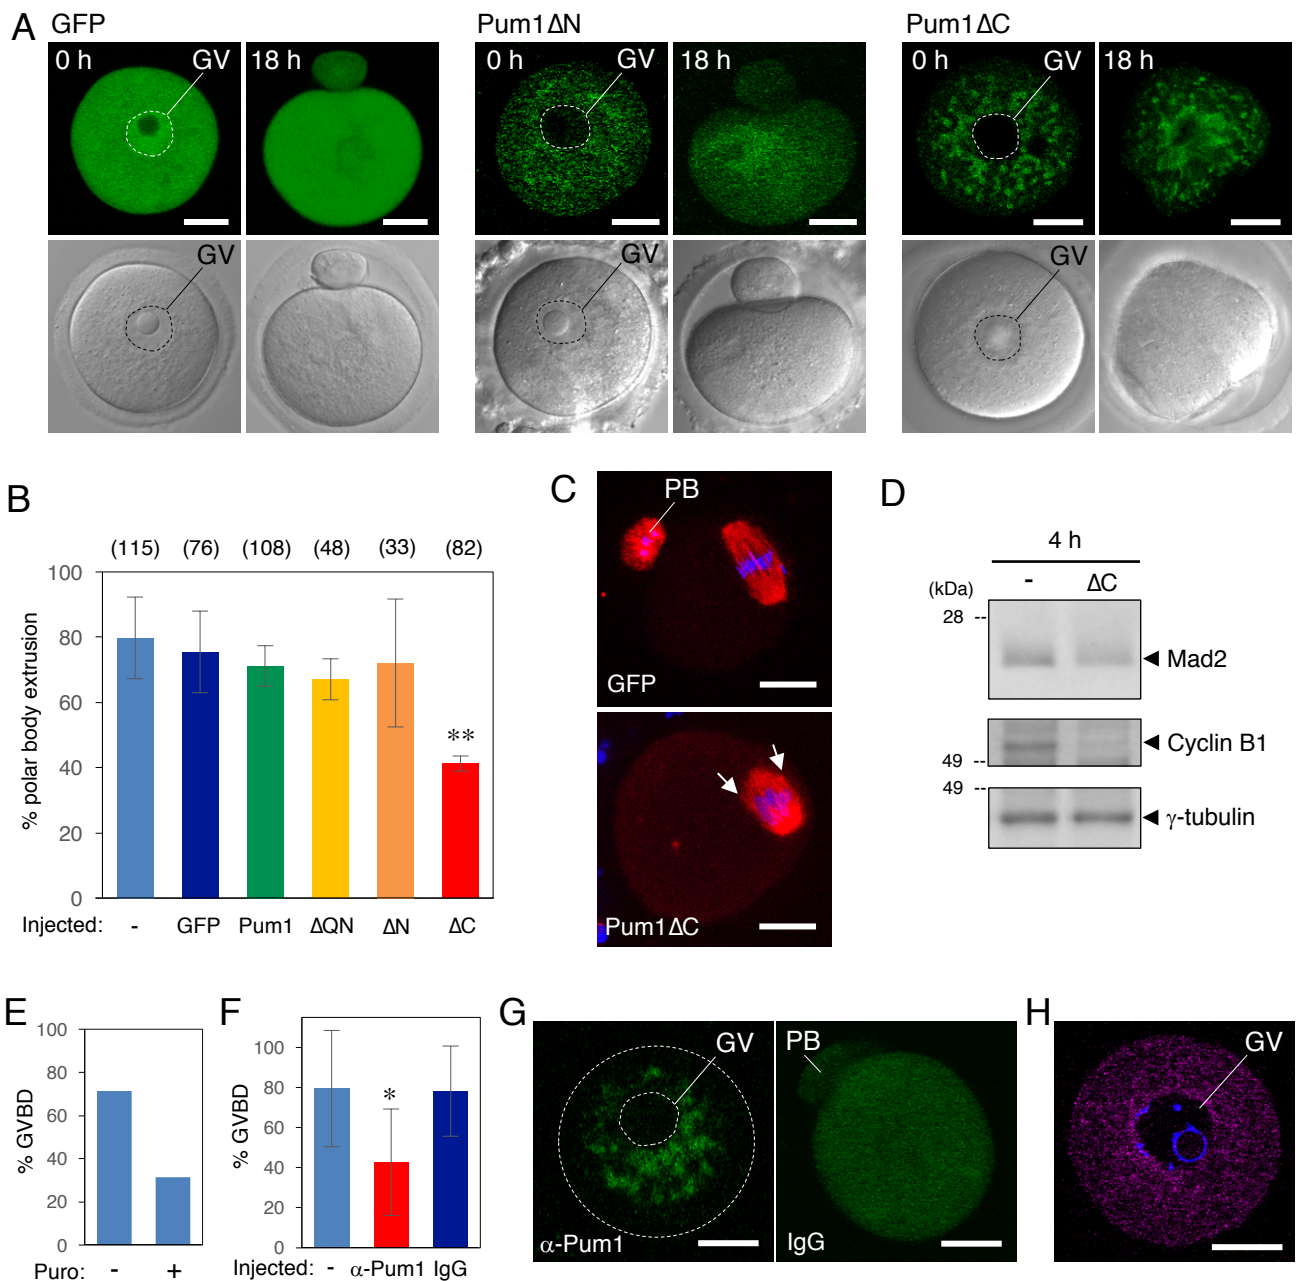

**Figure 6.** Stabilization of Pum1 aggregates prevents the translation of target mRNA. **(A)** Distributions of GFP, GFP-Pum1  $\Delta N$  and GFP-Pum1  $\Delta C$  at 0 and 18 h after resumption of meiosis. **(B)** Percentages of oocytes not injected (-) and injected with GFP, GFP-Pum1 (Pum1), GFP-Pum1  $\Delta QN$  ( $\Delta QN$ ), GFP-Pum1  $\Delta N$  ( $\Delta N$ ), and GFP-Pum1  $\Delta C$  ( $\Delta C$ ) that extruded a polar body (means  $\pm$  SD;  $n = 3$ ). The numbers in parentheses indicate the total numbers of oocytes analyzed.  $t$ -test relative to the oocytes injected with GFP:  $**P < 0.01$ . **(C)** Immunofluorescence of  $\beta$ -tubulin (red) in oocytes injected with GFP or GFP-Pum1  $\Delta C$  (Pum1  $\Delta C$ ). DNA is shown in blue. Arrows indicate multiple poles. Similar results were obtained from three independent experiments. **(D)** Immunoblotting of Mad2, Cyclin B1 and  $\gamma$ -tubulin in oocytes not injected (-) and injected with GFP-Pum1  $\Delta C$  ( $\Delta C$ ) 4 h after resumption of meiosis. Similar results were obtained from three independent experiments. **(E)** Percentages of oocytes incubated with (+) and without (-) puromycin (Puro) that induced GVBD. **(F)** Percentages of oocytes not injected (-) and injected with anti-Pum1 antibody ( $\alpha$ -Pum1) or control IgG (IgG) that induced GVBD (means  $\pm$  SD;  $n = 5$ ).  $t$ -test:  $*P < 0.05$ . **(G)** Distribution of GFP-Pum1 in oocytes injected with anti-Pum1 antibody ( $\alpha$ -Pum1) or control IgG (IgG). **(H)** Distribution of the injected anti-Pum1 antibody (magenta). DNA is shown in blue. GV, germinal vesicle; PB, polar body. Bars: 20  $\mu$ m.



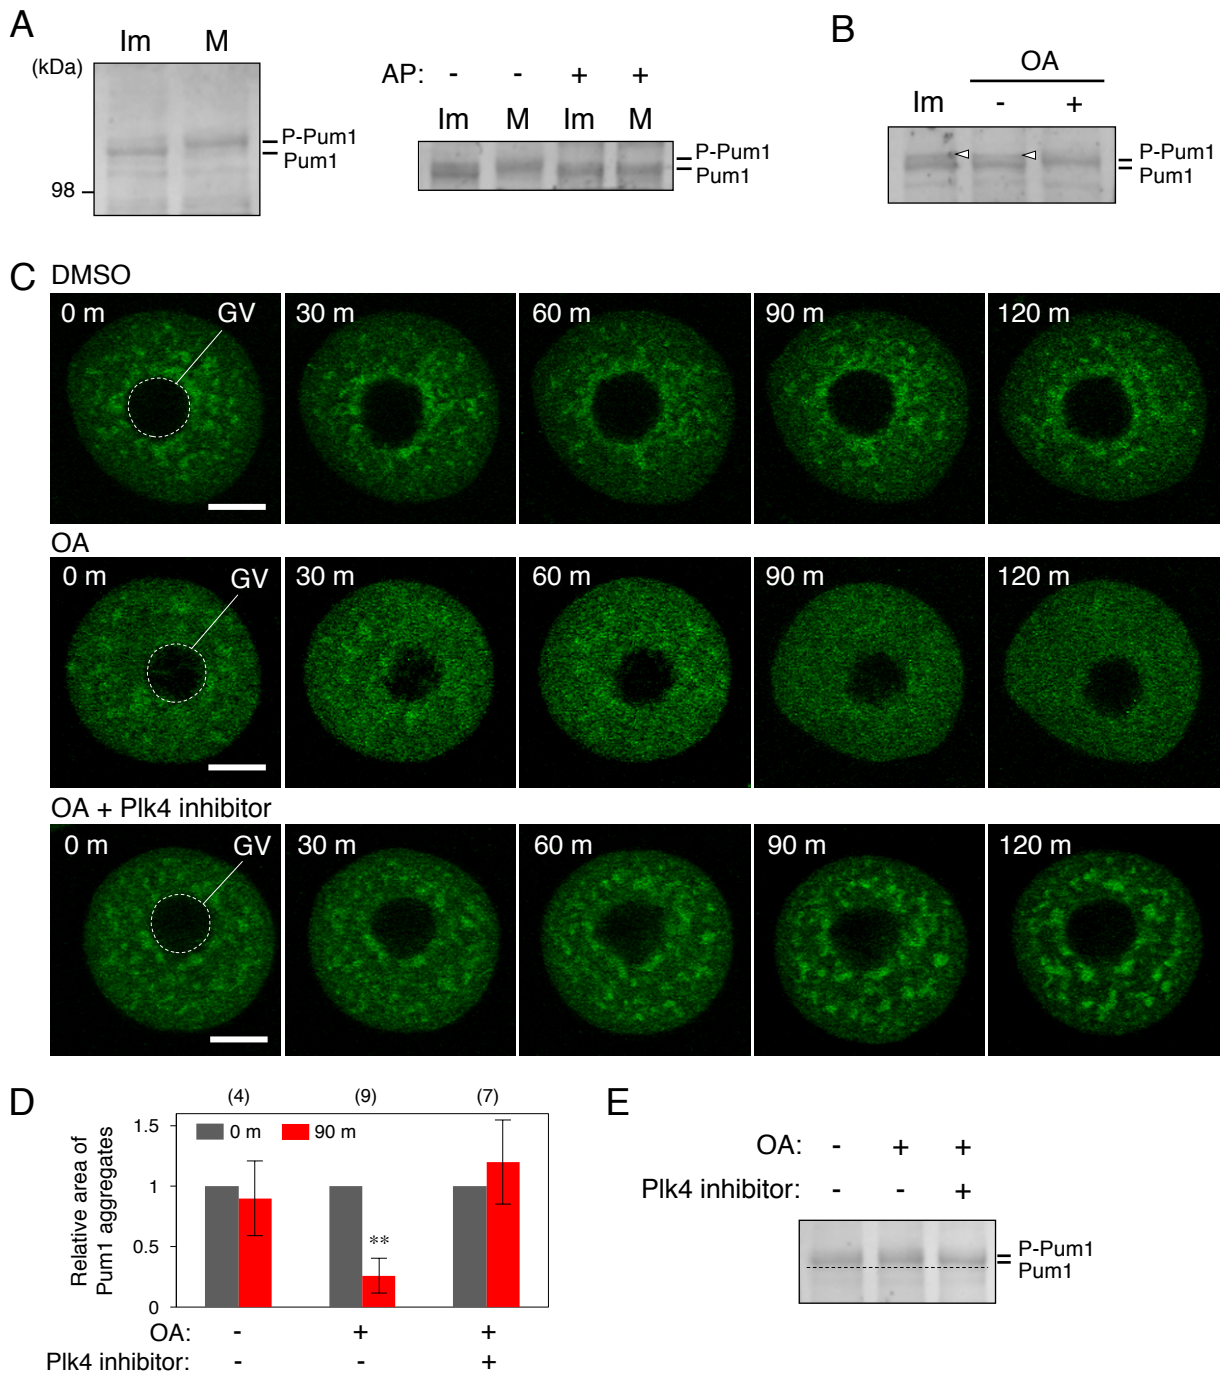

**Figure 7.** Phosphorylation of Pum1 triggers the dissolution of aggregates. **(A)** Phosphorylation of Pum1 (P-Pum1). (left) Immature (Im) and mature (M) oocytes were analyzed by immunoblotting. (right) Treatment with (+) and without (-) alkaline phosphatase (AP). Similar results were obtained from two independent experiments. **(B)** Pum1 phosphorylation in oocytes treated with OA (+) or DMSO (-). Arrowheads show nonspecific bands. Similar results were obtained from three independent experiments. **(C)** Time course of GFP-Pum1 in oocytes treated with DMSO, OA, or OA and Plk4 inhibitor 0-120 min after treatment. Similar results were obtained from three independent experiments. **(D)** Quantitative analysis of Pum1 aggregates in oocytes treated with (+) and without (-) OA or Plk4 inhibitor. The numbers in parentheses indicate the total numbers of oocytes analyzed. *t*-test:  $**P < 0.01$ . **(E)** Pum1 phosphorylation in oocytes at 60 min after treatment with (+) and without (-) OA or Plk4 inhibitor. The dotted line indicates the basal size of Pum1. GV, germinal vesicle. Bars: 20  $\mu$ m.

1 **Supplemental figure legends**

2 **Figure S1.** Expression of *Mad2* mRNA and effect of puromycin on Mad2 protein  
3 accumulation. (A) Quantitative PCR for the two types of *Mad2* mRNA and for long  
4 *Mad2* mRNA (mean  $\pm$  SD; n = 3). (B) Immunoblotting of Pum1 and Mad2 in oocytes  
5 incubated with puromycin at 0, 10, and 18 h after resumption of meiosis. (C)  
6 Quantitative analysis of Mad2 protein in experiments shown in C. Similar results were  
7 obtained from two independent experiments.

8  
9 **Figure S2.** Distribution of GFP-Pum1 and that of truncated forms of Pum1. (A)  
10 Schematic diagrams of mouse *Cyclin B1* and *Mad2* 3'UTRs. Green rectangles indicate  
11 putative Pumilio-binding elements (PBEs), and red rectangles indicate the poly(A)  
12 signal. (B) FISH analysis of *Cyclin B1* (top) and *Mad2* mRNA (bottom) and  
13 immunostaining of GFP in oocytes expressing GFP-Pum1. Arrows indicate aggregates  
14 of GFP-Pum1 surrounding *Cyclin B1* or *Mad2* RNA granules. Similar results were  
15 obtained from two independent experiments. (C) Identification of prion-like domains by  
16 using the PLAAC web application (<http://plaac.wi.mit.edu/>). (D) Distribution of GFP-  
17 Pum1  $\Delta$ N and GFP-Pum1  $\Delta$ C in immature oocytes. Similar results were obtained from  
18 six independent experiments. GV, germinal vesicle. Bar: 20  $\mu$ m.

19  
20 **Figure S3.** Time course of GFP-Pum1  $\Delta$ QN and GFP-Pum1  $\Delta$ N during oocyte  
21 maturation and that of GFP-Pum1 after OA treatment. (A) Time course of GFP-  
22 Pum1  $\Delta$ QN at 0, 2, 4 and 18 h after resumption of meiosis. (B) Time course of GFP-  
23 Pum1  $\Delta$ N at 0, 2, 4 and 18 h after resumption of meiosis. Similar results were obtained  
24 from two independent experiments. (C) Time course of GFP-Pum1 in oocytes treated  
25 with OA or OA and Plk1 inhibitor 0-120 min after treatment. Similar results were  
26 obtained in 6 oocytes from two independent experiments. GV, germinal vesicle. Bars:  
27 20  $\mu$ m.

28

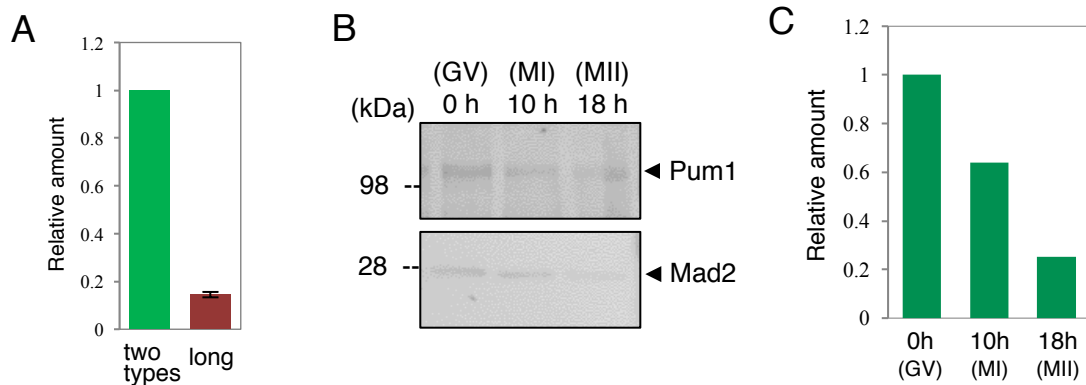

**Figure S1.** Expression of *Mad2* mRNA and effect of puromycin on Mad2 protein accumulation. **(A)** Quantitative PCR for the two types of *Mad2* mRNA and for long *Mad2* mRNA (mean  $\pm$  SD; n = 3). **(B)** Immunoblotting of Pum1 and Mad2 in oocytes incubated with puromycin at 0, 10, and 18 h after resumption of meiosis. **(C)** Quantitative analysis of Mad2 protein in experiments shown in C. Similar results were obtained from two independent experiments.

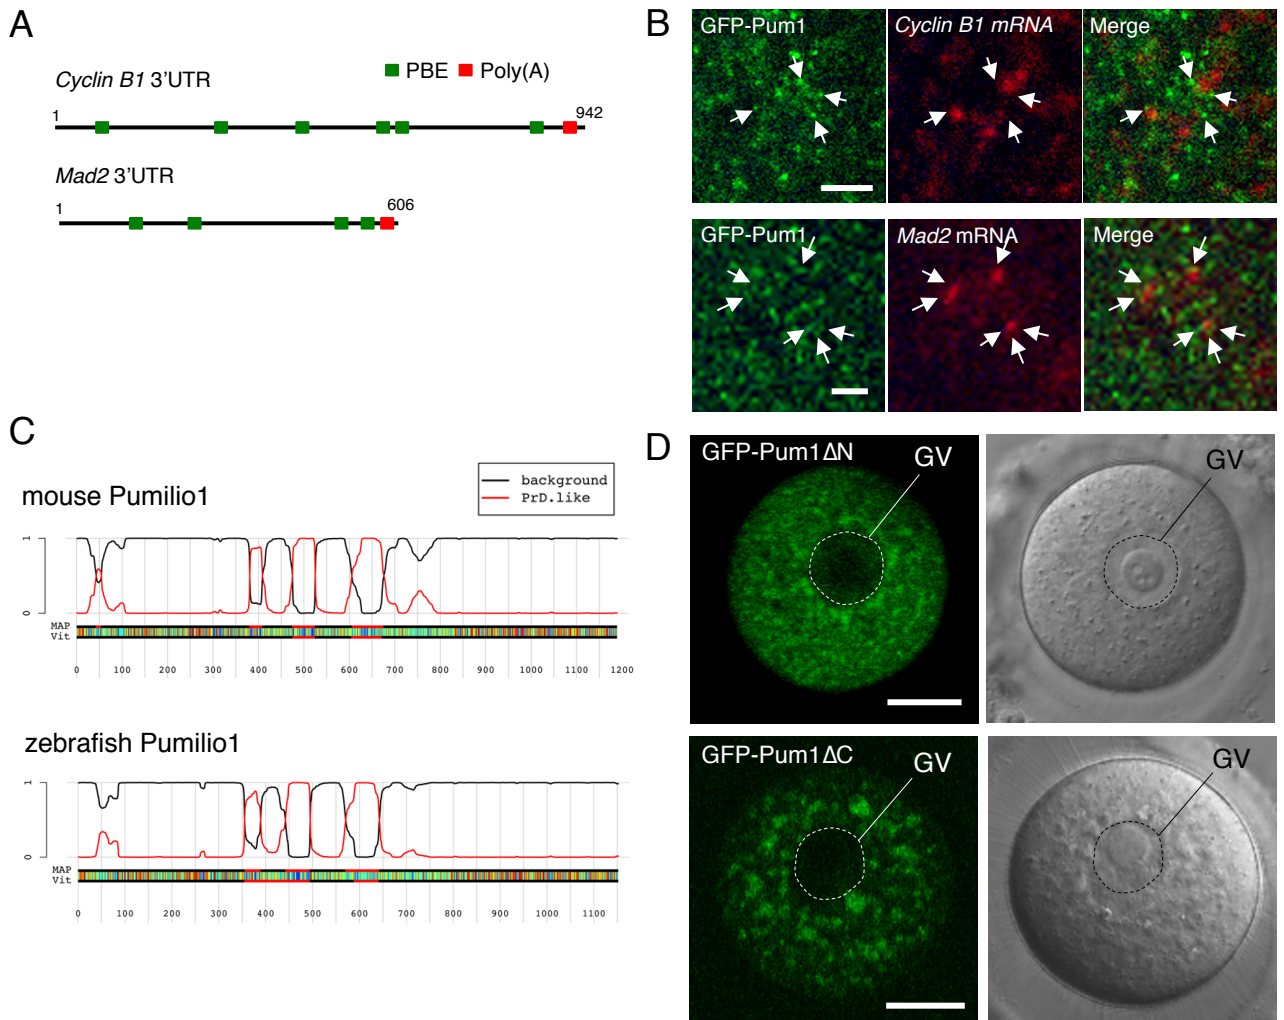

**Figure S2.** Distribution of GFP-Pum1 and that of truncated forms of Pum1. **(A)** Schematic diagrams of mouse *Cyclin B1* and *Mad2* 3'UTRs. Green rectangles indicate putative Pumilio-binding elements (PBEs), and red rectangles indicate the poly(A) signal. **(B)** FISH analysis of *Cyclin B1* (top) and *Mad2* mRNA (bottom) and immunostaining of GFP in oocytes expressing GFP-Pum1. Arrows indicate aggregates of GFP-Pum1 surrounding *Cyclin B1* or *Mad2* RNA granules. Similar results were obtained from two independent experiments. **(C)** Identification of prion-like domains by using the PLAAC web application (<http://plaac.wi.mit.edu/>). **(D)** Distribution of GFP-Pum1 $\Delta$ N and GFP-Pum1 $\Delta$ C in immature oocytes. Similar results were obtained from six independent experiments. GV, germinal vesicle. Bar: 20  $\mu$ m.

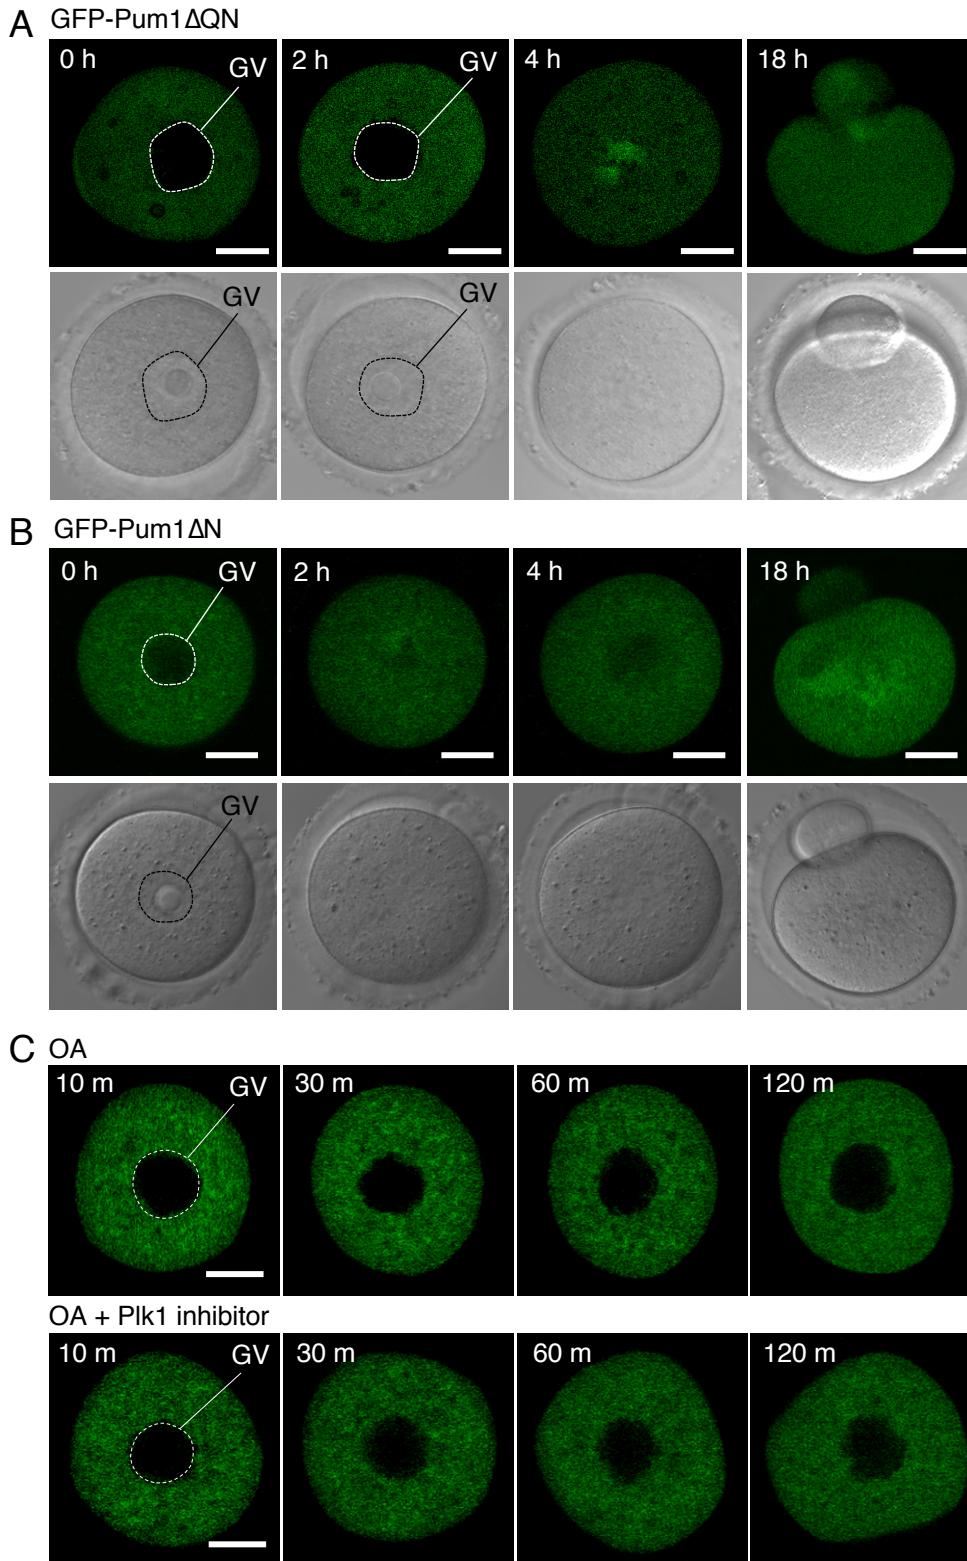

**Figure S3.** Time course of GFP-Pum1 $\Delta$ QN and GFP-Pum1 $\Delta$ N during oocyte maturation and that of GFP-Pum1 after OA treatment. **(A)** Time course of GFP-Pum1 $\Delta$ QN at 0, 2, 4 and 18 h after resumption of meiosis. **(B)** Time course of GFP-Pum1 $\Delta$ N at 0, 2, 4 and 18 h after resumption of meiosis. Similar results were obtained from two independent experiments. **(C)** Time course of GFP-Pum1 in oocytes treated with OA or OA and Plk1 inhibitor 0-120 min after treatment. Similar results were obtained in 6 oocytes from two independent experiments. GV, germinal vesicle. Bars: 20  $\mu$ m.
